# Supplementary material for: A step forward in the development of superoxide dismutase mimetic nanozymes: the effect of the charge of the surface on antioxidant activity
Source: Royal Society of Chemistry journal article supplement (doi:10.1039/c9ra08992f), 2019-01-01
Supplement: c9ra08992f1.pdf [file c9ra08992f1.pdf]

## Supporting Information

# **A step forward in the development of SOD mimetic nanozymes: the effect of the charge of the surface on antioxidant activity**

Álvaro Martínez-Camarena, José M. Llinares, Antonio Domenech-Carbó, Javier Alarcón, Enrique García-España.

# Contents

## I. Figures

**Figure S1.**  $^1\text{H}$ -NMR spectrum of **L1** in  $\text{D}_2\text{O}$  at 298 K.

**Figure S2.**  $^{13}\text{C}$ -NMR spectrum of **L1** in  $\text{D}_2\text{O}$  at 298 K.

**Figure S3.** Mass spectrum of **L1**.

**Figure S4.**  $^1\text{H}$ -NMR spectrum of **L2** in  $\text{D}_2\text{O}$  at 298 K.

**Figure S5.**  $^{13}\text{C}$ -NMR spectrum of **L2** in  $\text{D}_2\text{O}$  at 298 K.

**Figure S6.** Mass spectrum of **L2**.

**Figure S7.** Experimental (red, continuous line) and theoretical (discrete red peaks) diffractogram of the boehmite nanoparticles powder.

**Figure S8.** Size dispersion diagram of the boehmite nanoparticles obtained by DLS.

**Figure S9.** Experimental  $\zeta$ -potential of the oxidic nanoparticles. The continuous lines correspond to the non-functionalised nanoparticles, while the dotted lines correspond to the NPs functionalised with **L1** and the dotted-dashed ones to the NPs functionalised with **L2**.

**Figure S10.** Experimental  $\zeta$ -potential of the oxidic nanoparticles. The continuous lines correspond to the non-functionalised nanoparticles, while the dotted lines correspond to the NPs functionalised with  $\text{Cu}_2\text{L1}$  and the dotted-dashed ones to the NPs functionalised with  $\text{Cu}_2\text{L2}$ .

**Figure S11.**  $^1\text{H}$ -NMR spectra of the three BNP-**L1** samples in  $\text{D}_2\text{O}$  at 298 K.

**Figure S12.** Calibration and interpolation of **L1** anchoring to boehmite nanoparticles by NMR determination.

**Figure S13.**  $^1\text{H}$ -NMR spectra of the three SNP-**L1** samples in  $\text{D}_2\text{O}$  at 298 K.

**Figure S14.** Calibration and interpolation of **L1** anchoring to silica nanoparticles by NMR determination.

**Figure S15.**  $^1\text{H}$ -NMR spectra of the three BNP-**L2** samples in  $\text{D}_2\text{O}$  at 298 K.

**Figure S16.** Calibration and interpolation of **L2** anchoring to boehmite nanoparticles by NMR determination.

**Figure S17.**  $^1\text{H}$ -NMR spectra of the three SNP-**L2** samples in  $\text{D}_2\text{O}$  at 298 K.

**Figure S18.** Calibration and interpolation of **L2** anchoring to silica nanoparticles by NMR determination.

**Figure S19.** Distribution diagram of **L3** as a function of the pH in aqueous solution.

**Figure S20.** Distribution diagram of **L4** as a function of the pH in aqueous solution.

**Figure S21.** Distribution diagram of the  $\text{Cu}_2^+:\text{L1}$  1:1 system as a function of the pH in aqueous solution. The UV-Vis spectroscopic parameters of the pyridine system (red dots) and d-d transition band (blue dots) are overlaid.

**Figure S22.** Distribution diagram of the  $\text{Cu}_2^+:\text{L2}$  1:1 system as a function of the pH in aqueous

solution.

**Figure S23.** Distribution diagram of the  $\text{Cu}_{2+}:\text{L3}$  1:1 system as a function of the pH in aqueous solution.

**Figure S24.** Distribution diagram of the  $\text{Cu}_{2+}:\text{L4}$  1:1 system as a function of the pH in aqueous solution.

**Figure S25.** Distribution diagram of the  $\text{Cu}_{2+}:\text{L3}$  2:1 system as a function of the pH in aqueous solution.

**Figure S26.** Distribution diagram of the  $\text{Cu}_{2+}:\text{L4}$  2:1 system as a function of the pH in aqueous solution.

**Figure S27.** Representation of  $\text{pCu}_{2+}$  vs. pH for **L1** (brown line), **L2** (blue line), **L3** (green line) and **L4** (yellow line) ( $[\text{Cu}_{2+}]_{\text{tot}} = 2 \cdot 10^{-6} \text{ M}$ ;  $[\text{L}]_{\text{tot}} = 10^{-5} \text{ M}$ ).

**Figure S28.** DFT optimized structure of  $\text{Cu}_{2+}:\text{L1}$  complex at physiological pH (7.40): A)  $\text{Cu}_{2+}:\text{L1}$  1:1, B)  $\text{Cu}_{2+}:\text{L1}$  2:1.

**Figure S29.** Distribution diagram of the  $\text{Cu}_{2+}:\text{L1}$  1:1 system as a function of the pH in aqueous solution.

**Figure S30.** Distribution diagram of the  $\text{Cu}_{2+}:\text{L2}$  1:1 system as a function of the pH in aqueous solution.

**Figure S31.** Distribution diagram of the  $\text{Cu}_{2+}:\text{L3}$  1:1 system as a function of the pH in aqueous solution.

**Figure S32.** Distribution diagram of the  $\text{Cu}_{2+}:\text{L4}$  1:1 system as a function of the pH in aqueous solution.

**Figure S33.** Distribution diagram of the  $\text{Cu}_{2+}:\text{L3}$  2:1 system as a function of the pH in aqueous solution.

**Figure S34.** Distribution diagram of the  $\text{Cu}_{2+}:\text{L4}$  2:1 system as a function of the pH in aqueous solution.

**Figure S35.** Cyclic voltammograms at glassy carbon electrode of  $10^{-3} \text{ M}$  solutions of A)  $\text{CuL1}$ , B)  $\text{Cu}_2\text{L1}$ , C)  $\text{CuL2}$ , D)  $\text{Cu}_2\text{L2}$  in  $0.15 \text{ NaClO}_4$  aqueous solutions at pH 7.4. Potential scan rate  $50 \text{ mV s}^{-1}$ . Semi-derivative deconvolution of data was performed to increase peak resolution.

**Figure S36.** Cyclic voltammograms at glassy carbon electrode of  $10^{-3} \text{ M}$  solutions of  $\text{Cu}_{2+}$  (aq) plus **BNP-L2** in A) 1:1 and B) 2:1 molar ratios, in  $0.15 \text{ NaClO}_4$  aqueous solutions at pH 7.4. Semi-derivative deconvolution of data was performed to increase peak resolution.

**Figure S37.** Thermochemical cycle for the NP-complex interaction and electrochemistry.

**Figure S38.** Fitting of the SOD activity data obtained by the McCord-Fridovich method for the system  $\text{Cu}_2\text{-L2}$ .

**Figure S39.** Fitting of the SOD activity data obtained by the McCord-Fridovich method for the system  $\text{Cu}_2\text{-BNP-L2}$ .

**Figure S40.** Fitting of the SOD activity data obtained by the McCord-Fridovich method for the system Cu<sub>2</sub>-**SNP-L1**.

**Figure S41.** Fitting of the SOD activity data obtained by the McCord-Fridovich method for the system Cu<sub>2</sub>-**SNP-L2**.

**Figure S42.** Representation of the catalytic constant corresponding to the systems: a) Cu-**L5**, Cu-**L6**, Cu-**L7**, Cu-**L8**, Cu<sub>2</sub>-**L3**, Cu<sub>2</sub>-**L1**, Cu<sub>2</sub>-**L2**, Cu<sub>2</sub>-**L9**, Cu<sub>2</sub>-**L10**, Cu<sub>2</sub>-**L4**, Cu<sub>2</sub>-**SNP-L1**, Cu<sub>2</sub>-**SNP-L2**, Cu<sub>2</sub>-**BNP-L2**, Cu<sub>2</sub>-**BNP-L1**.<sup>1,3</sup>

**Figure S43.** Representation of the variation of the absorbance intensity with time at 219 nm for H<sub>2</sub>O<sub>2</sub> solutions with the presence of the ligands, both functionalised and free in solution. Yellow line corresponds to the EUK-134 reference.<sup>1</sup>

## II. Tables.

**Table S1.** Concentration of the grafted ligand, Cu<sub>2+</sub> complexation capability and  $\zeta$ -potential values determined for the different nanoparticle systems. All measurements were carried out in 10<sup>-4</sup> M NaClO<sub>4</sub> at pH 7.4.

**Table S2.** Logarithms of the stepwise protonation constants for **L3** and **L4** obtained by potentiometric measurements.<sup>1</sup> The constants were determined in 0.15 M NaClO<sub>4</sub> at 298.1 ± 0.1 K.

**Table S3.** Logarithm of the equilibrium constants for the interaction of Cu<sub>2+</sub> with **L3** and **L4** obtained by potentiometric measurements.<sup>1</sup> The logarithms constants were determined in 0.15 M NaClO<sub>4</sub> at 298.1 ± 0.1 K.

**Table S4.** Logarithms of the equilibrium constants for the interaction of Zn<sub>2+</sub> with **L1** and **L2** obtained by potentiometric measurements. The logarithms constants were determined in 0.15 M NaClO<sub>4</sub> at 298.1 ± 0.1 K.

**Table S5.** Logarithm of the equilibrium constants for the interaction of Zn<sub>2+</sub> with **L3** and **L4** obtained by potentiometric measurements.<sup>1</sup> The logarithms constants were determined in 0.15 M NaClO<sub>4</sub> at 298.1 ± 0.1 K.

**Table S6.** Logarithm of the equilibrium constants for the interaction of Cu<sub>2+</sub> and Zn<sub>2+</sub> with **L3** and **L4** obtained by potentiometric measurements.<sup>1</sup> The logarithms constants were determined in 0.15 M NaClO<sub>4</sub> at 298.1 ± 0.1 K.

## III. References.

## I. Figures

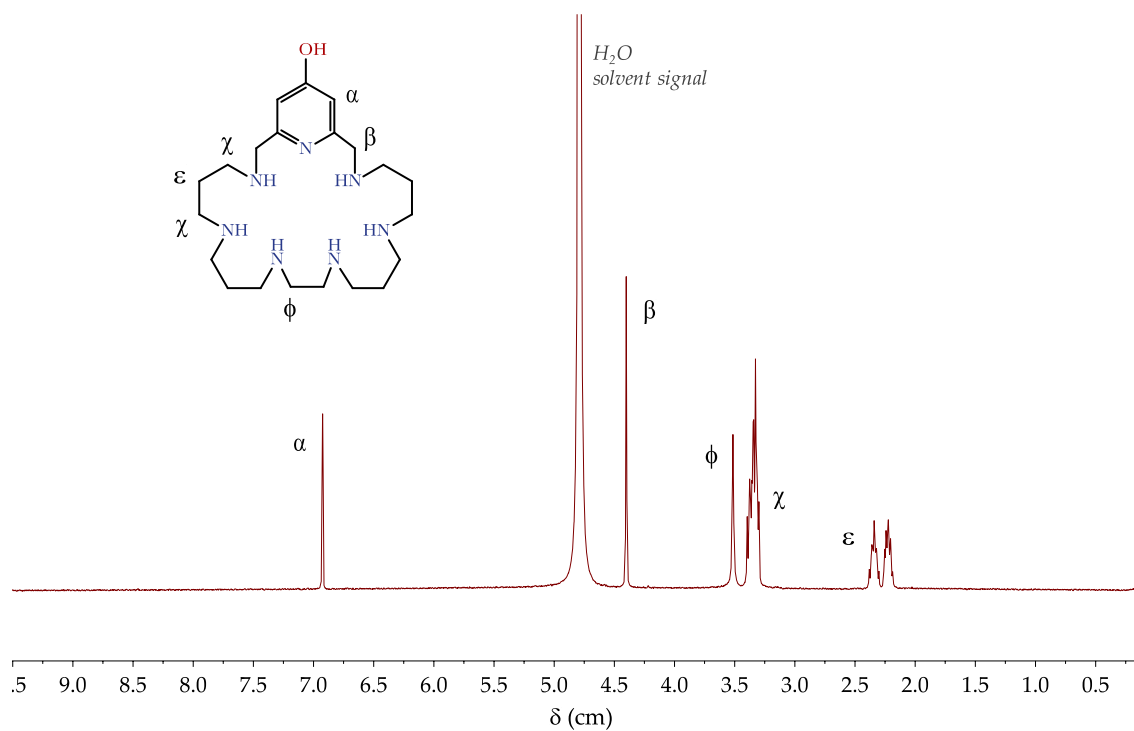

**Figure S1.**  $^1\text{H-NMR}$  spectrum of **L1** in  $\text{D}_2\text{O}$  at 298 K.

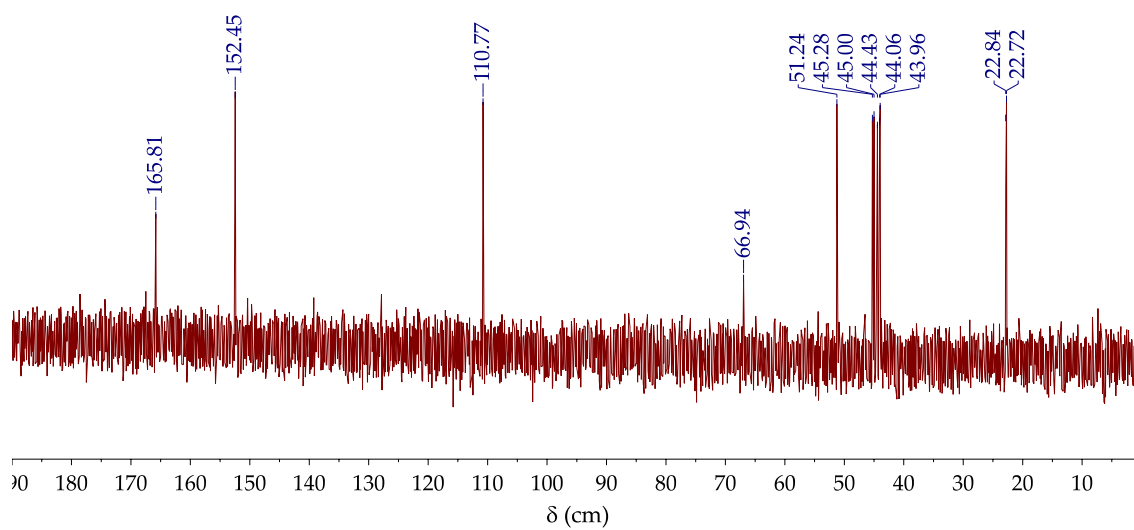

**Figure S2.**  $^{13}\text{C-NMR}$  spectrum of **L1** in  $\text{D}_2\text{O}$  at 298 K.

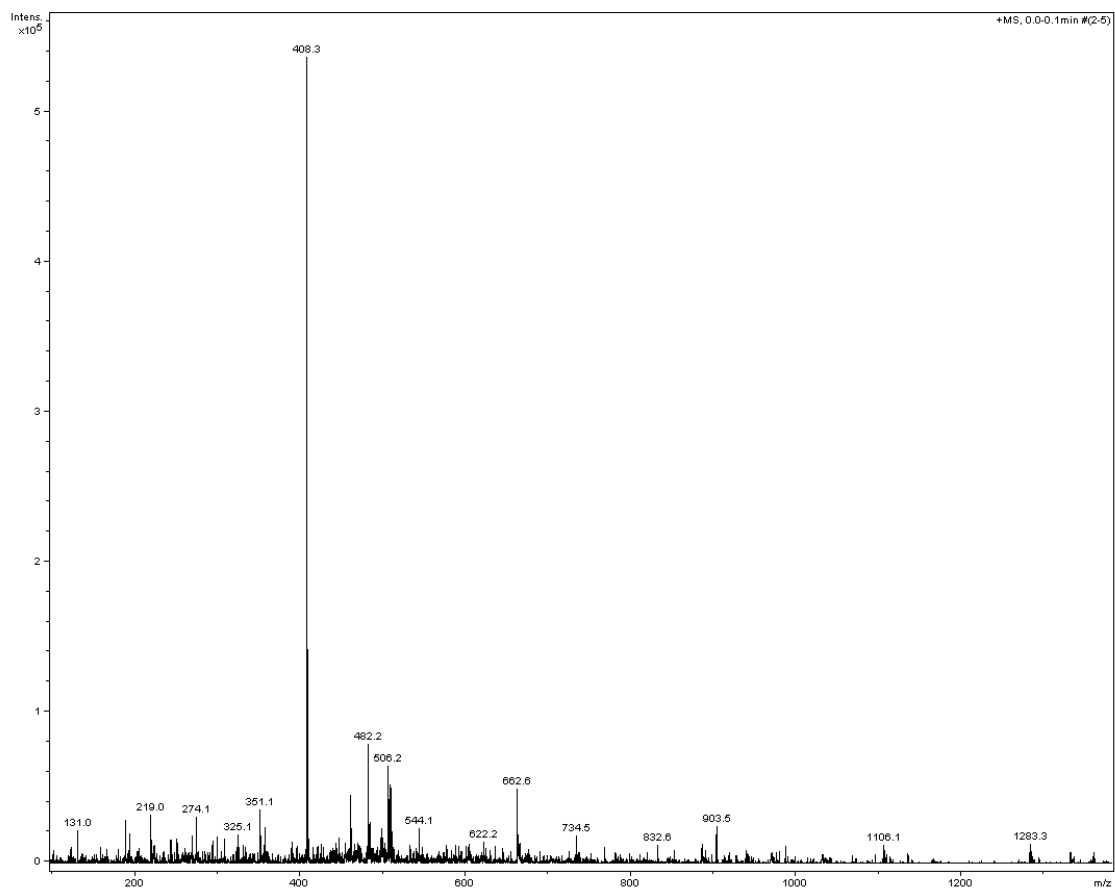

**Figure S3.** Mass spectrum of L1.

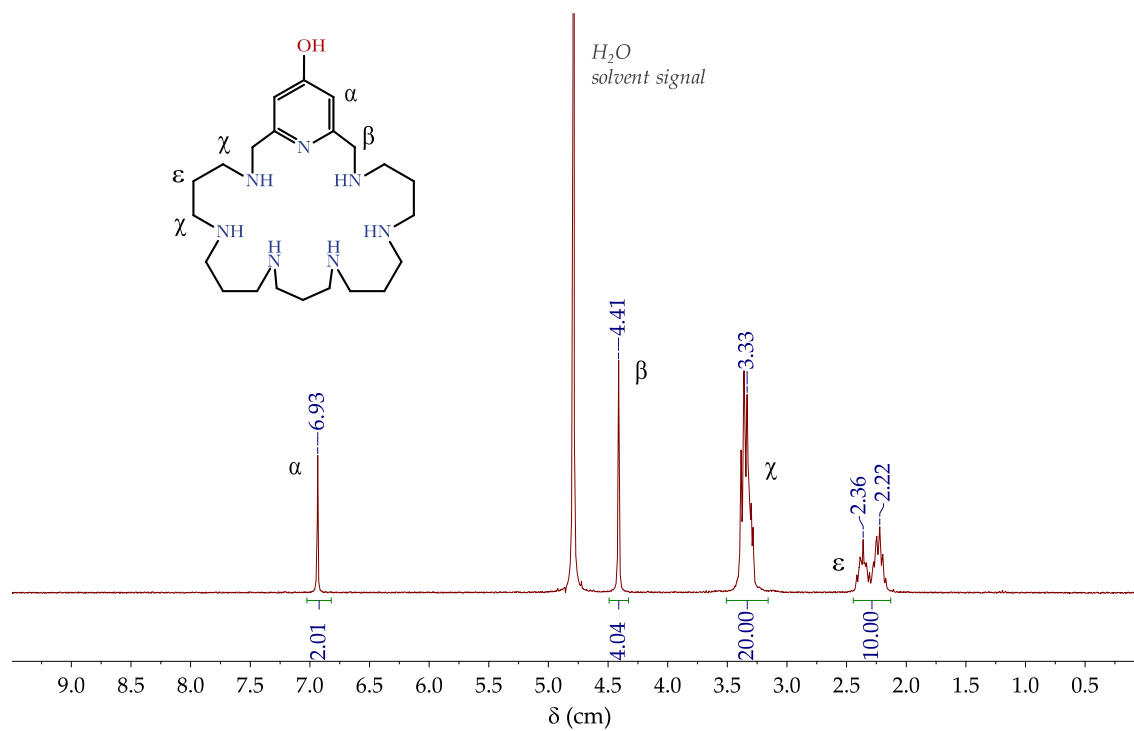

**Figure S4.**  $^1\text{H-NMR}$  spectrum of L2 in  $\text{D}_2\text{O}$  at 298 K.

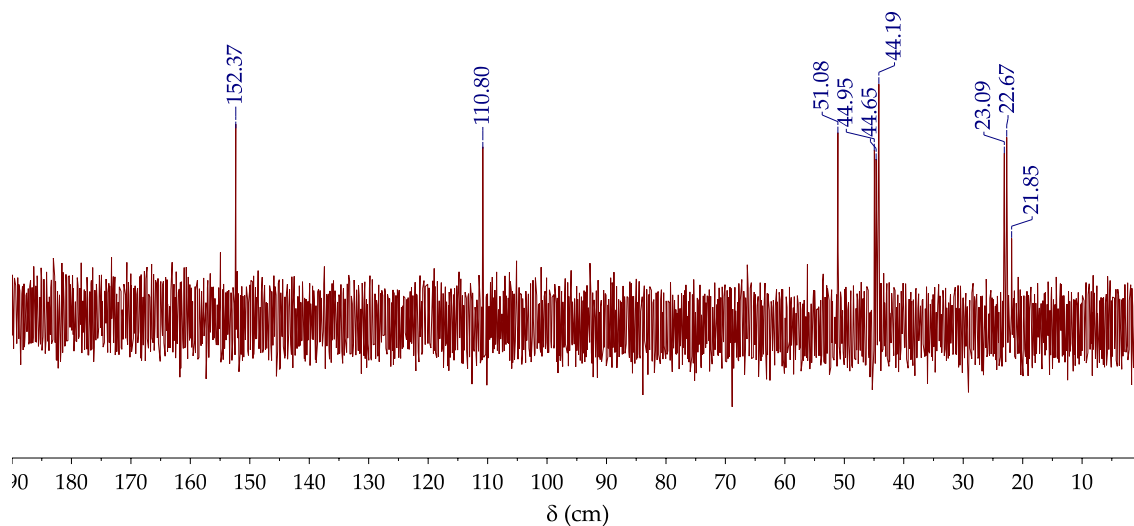

**Figure S5.**  $^{13}\text{C}$ -NMR spectrum of L2 in  $\text{D}_2\text{O}$  at 298 K.

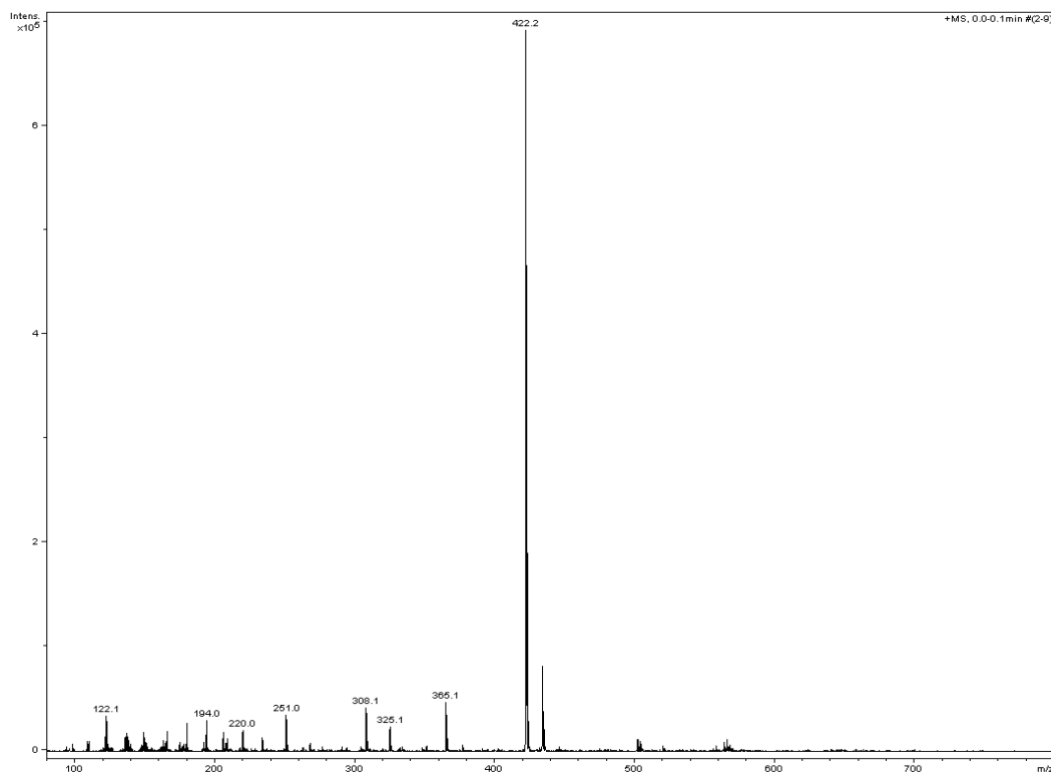

**Figure S6.** Mass spectrum of L2.

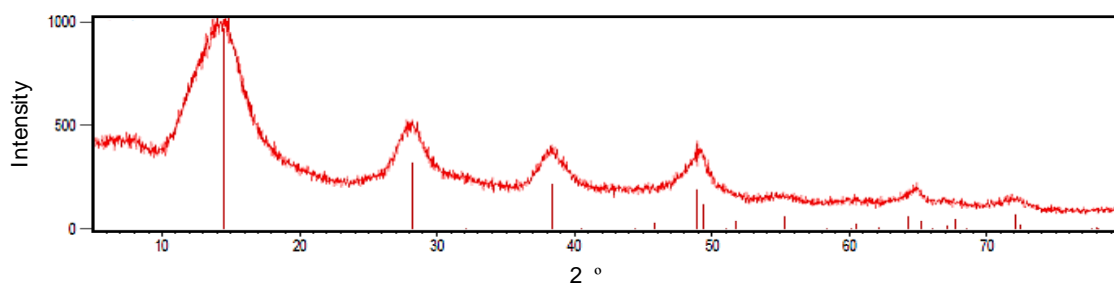

**Figure S7.** Experimental (red, continuous line) and theoretical (discrete red peaks) diffractogram of the boehmite nanoparticles powder.

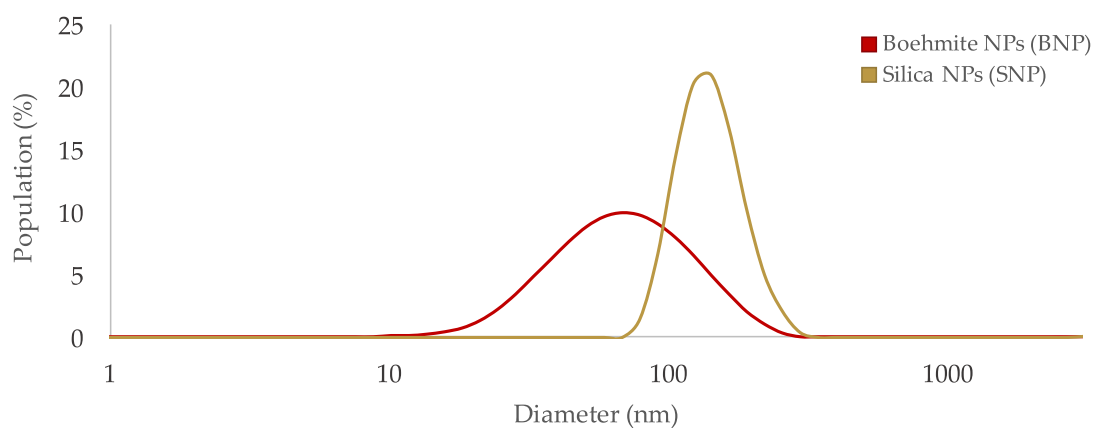

**Figure S8.** Size dispersion diagram of the boehmite nanoparticles obtained by DLS.

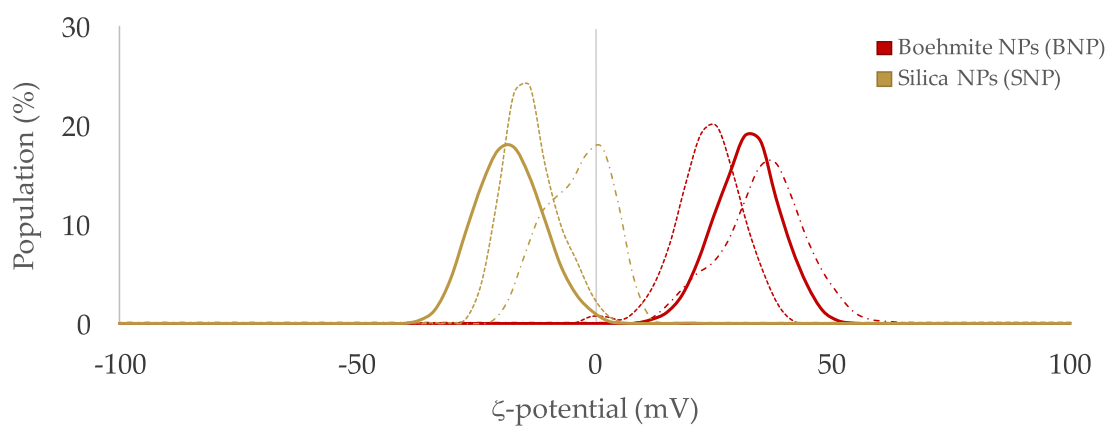

**Figure S9.** Experimental  $\zeta$ -potential of the oxidic nanoparticles. The continuous lines correspond to the non-functionalised nanoparticles, while the dotted lines correspond to the NPs functionalised with **L1** and the dotted-dashed ones to the NPs functionalised with **L2**.



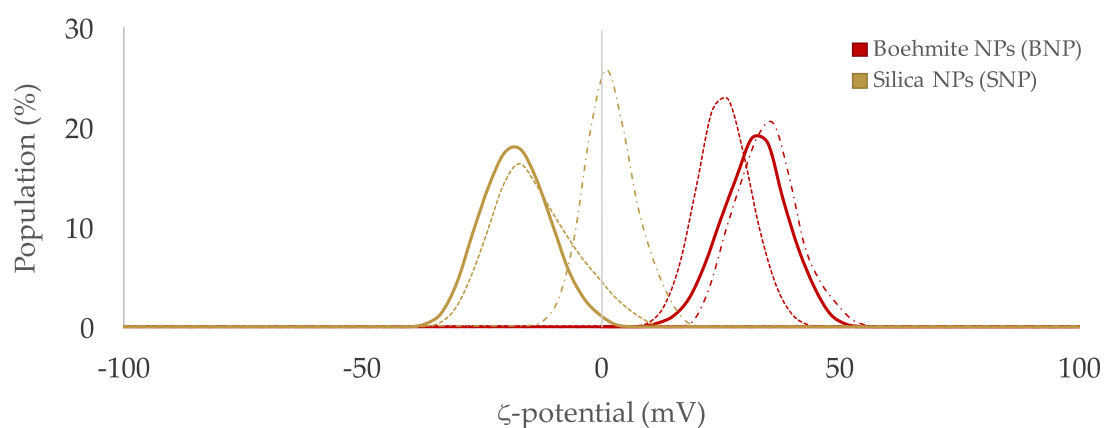

**Figure S10.** Experimental  $\zeta$ -potential of the oxidic nanoparticles. The continuous lines correspond to the non-functionalised nanoparticles, while the dotted lines correspond to the NPs functionalised with Cu<sub>2</sub>L1 and the dotted-dashed ones to the NPs functionalised with Cu<sub>2</sub>L2.

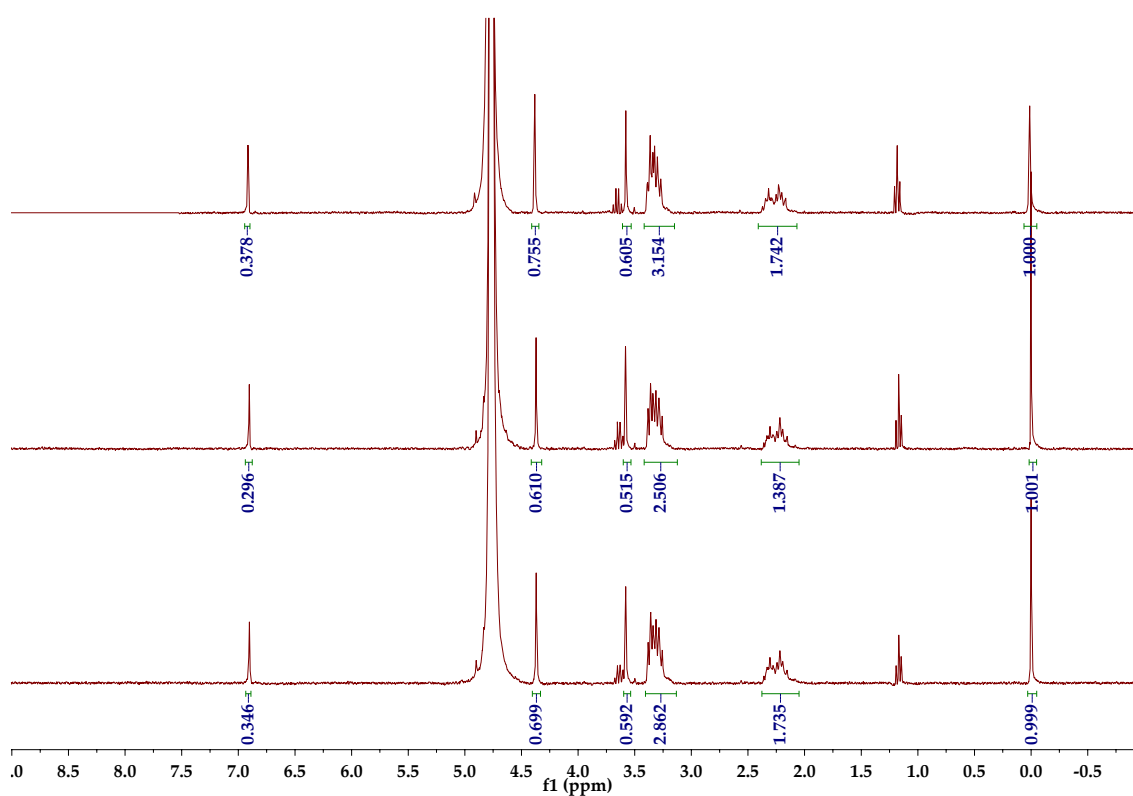

**Figure S11.** <sup>1</sup>H-NMR spectra of the three BNP-L1 samples in D<sub>2</sub>O at 298 K.

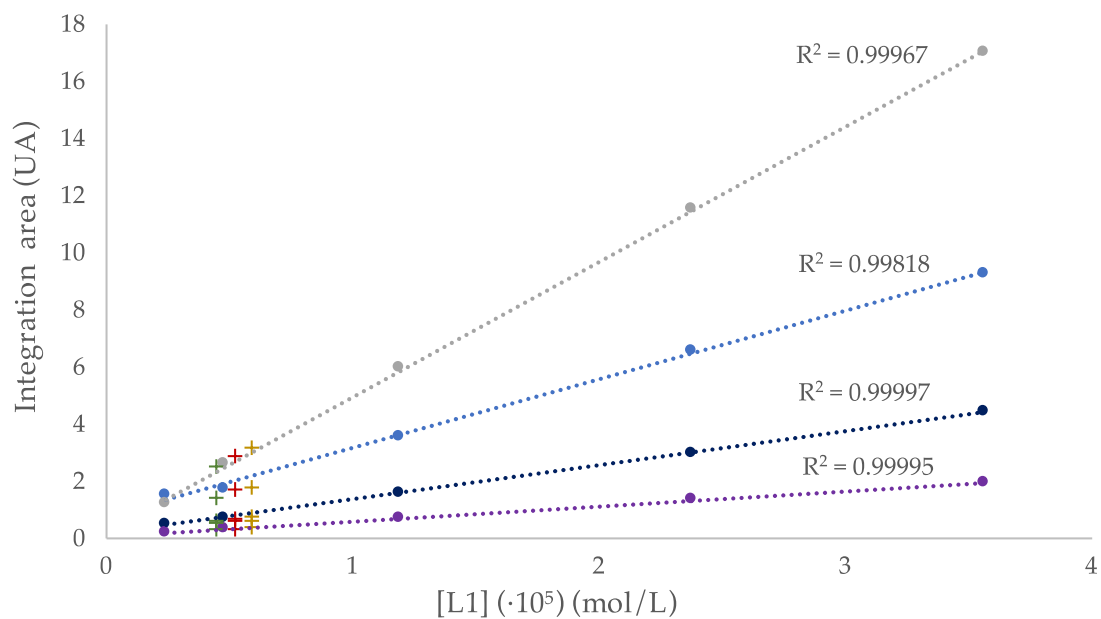

**Figure S12.** Calibration and interpolation of **L1** anchoring to boehmite nanoparticles by NMR determination.

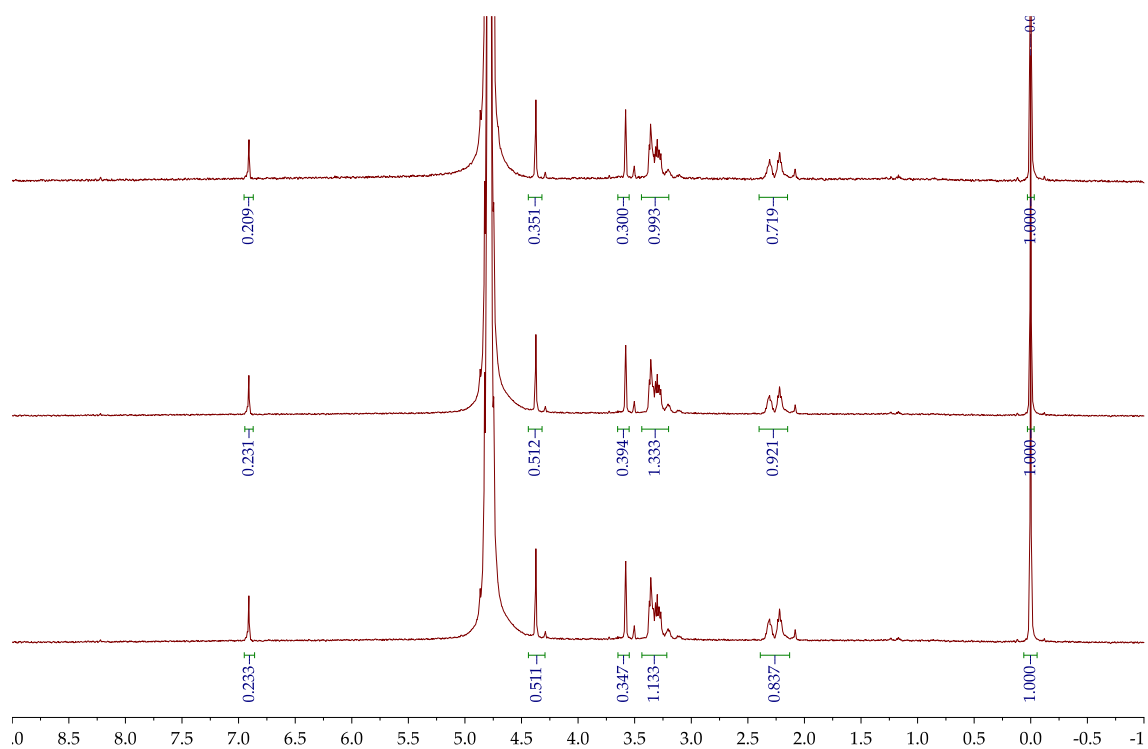

**Figure S13.**  $^1\text{H-NMR}$  spectra of the three SNP-L1 samples in  $\text{D}_2\text{O}$  at 298 K.

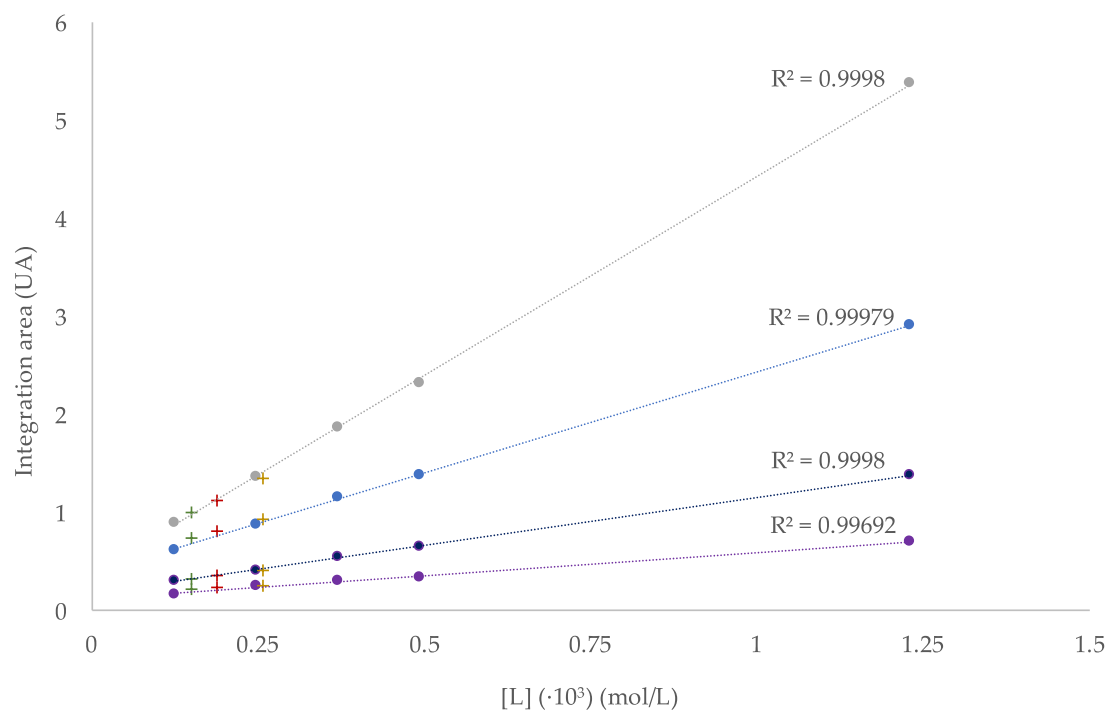

**Figure S14.** Calibration and interpolation of **L1** anchoring to silica nanoparticles by NMR determination.

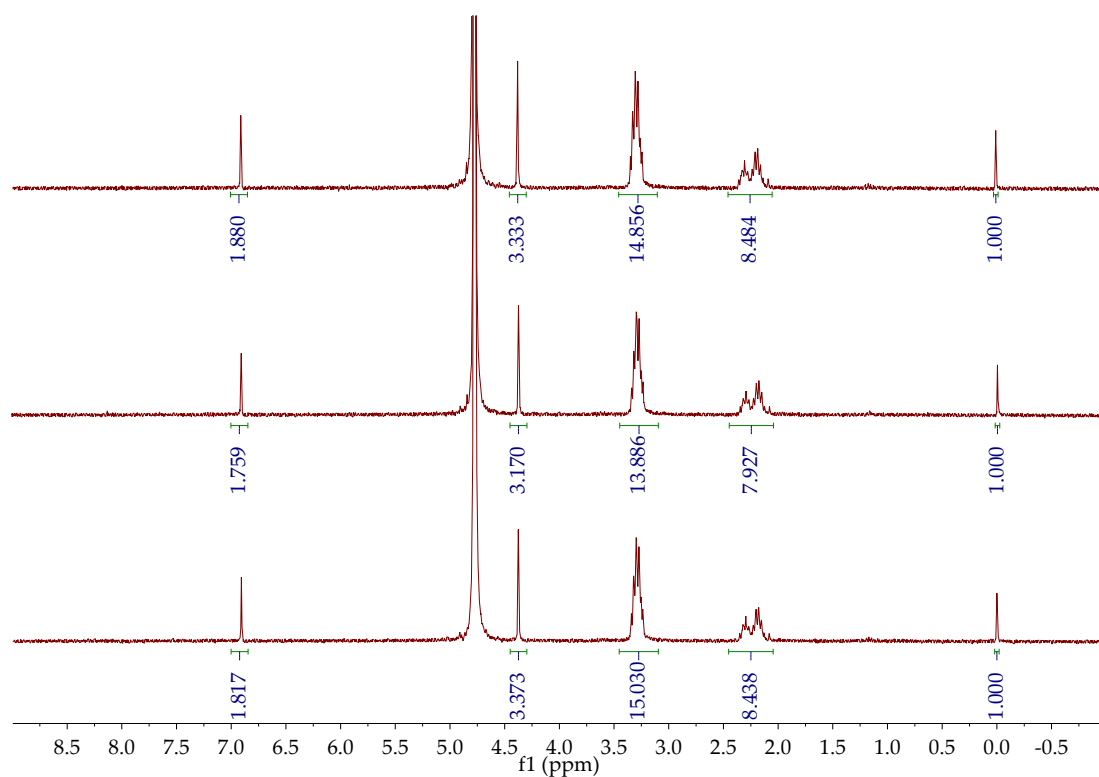

**Figure S15.** <sup>1</sup>H-NMR spectra of the three BNP-L2 samples in D<sub>2</sub>O at 298 K.

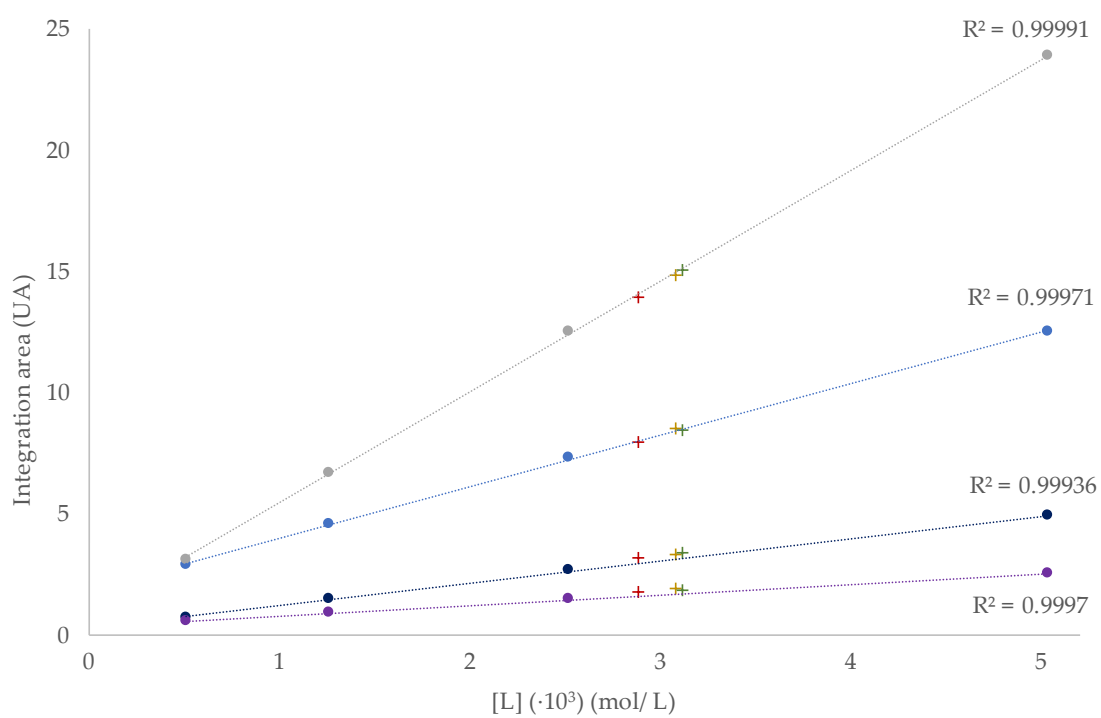

**Figure S16.** Calibration and interpolation of **L2** anchoring to boehmite nanoparticles by NMR determination.

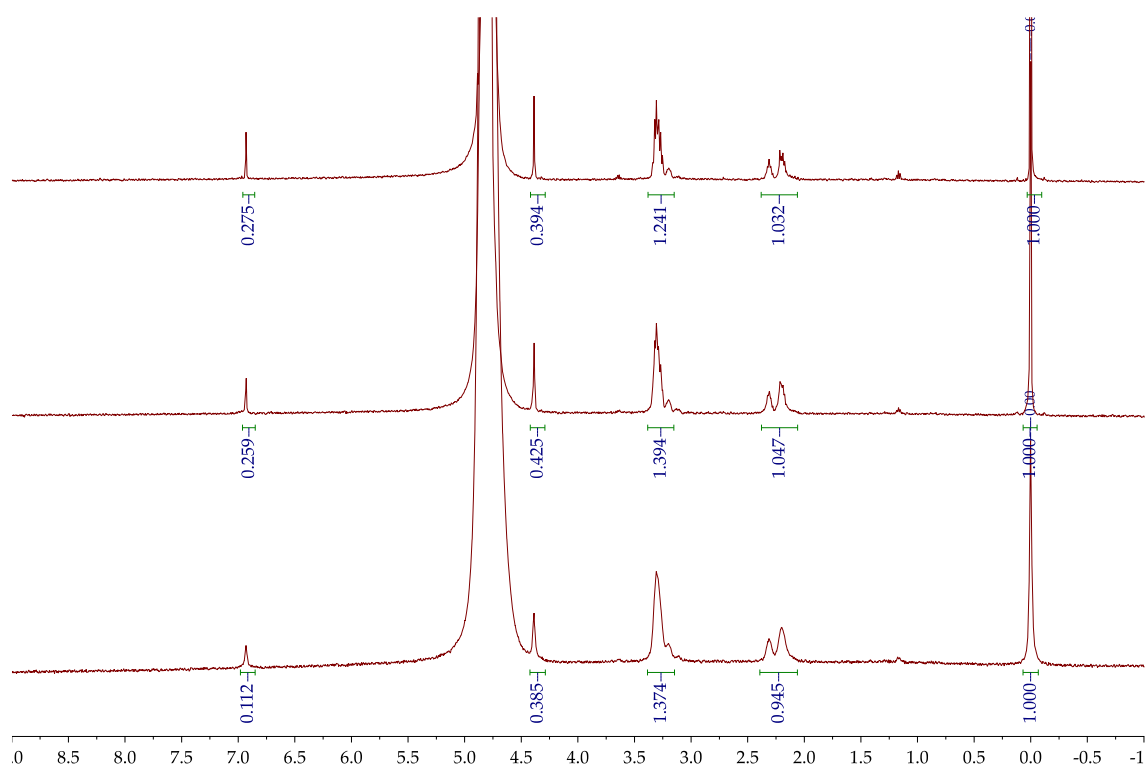

**Figure S17.**  $^1\text{H}$ -NMR spectra of the three SNP-**L2** samples in  $\text{D}_2\text{O}$  at 298 K.

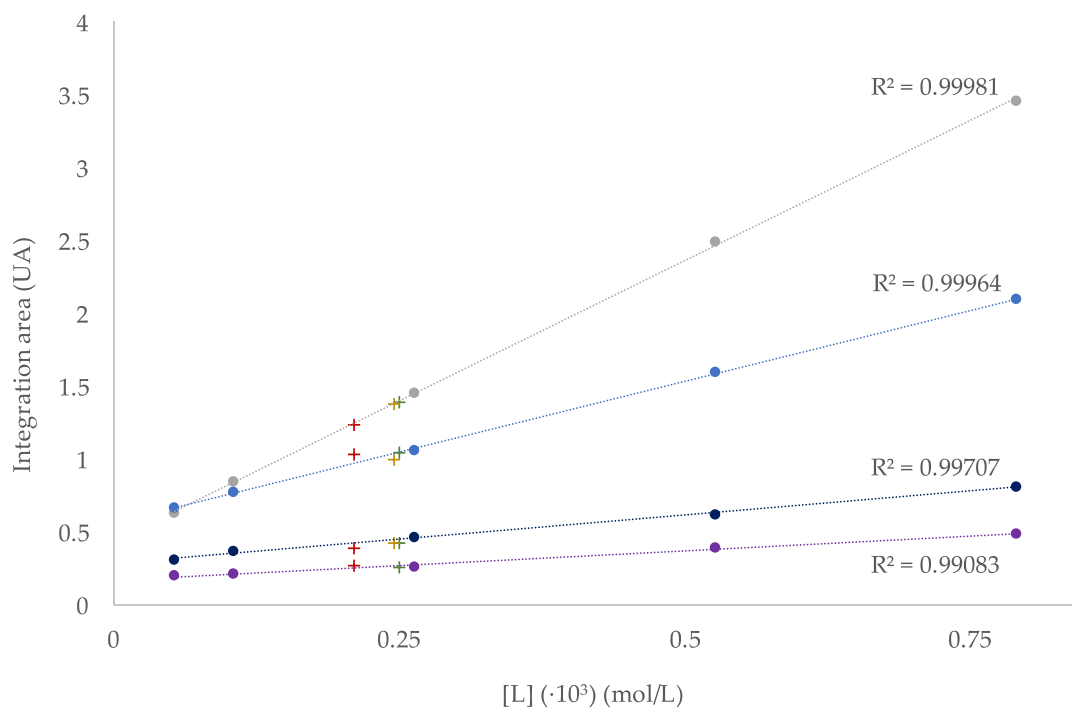

**Figure S18.** Calibration and interpolation of **L2** anchoring to silica nanoparticles by NMR determination.

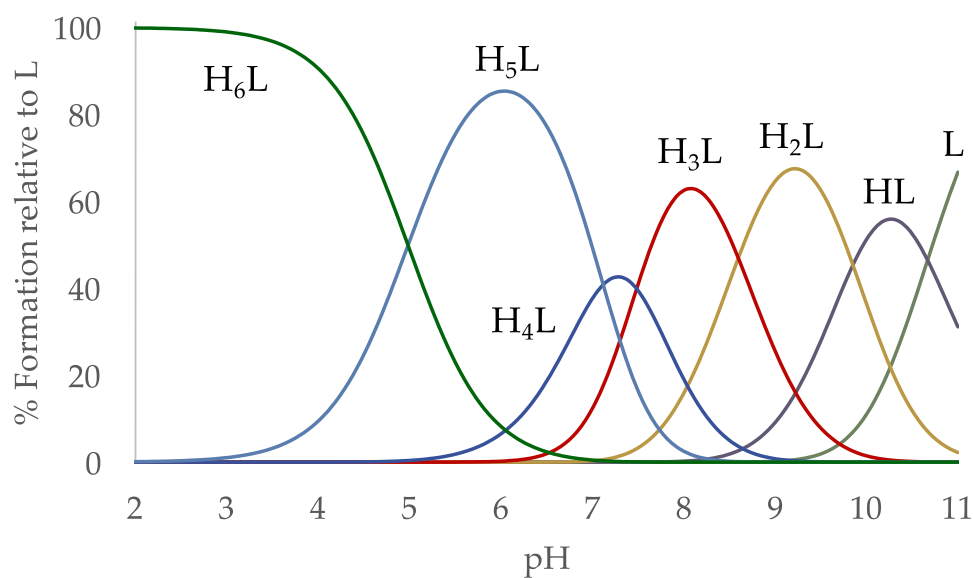

**Figure S19.** Distribution diagram of **L3** as a function of the pH in aqueous solution.

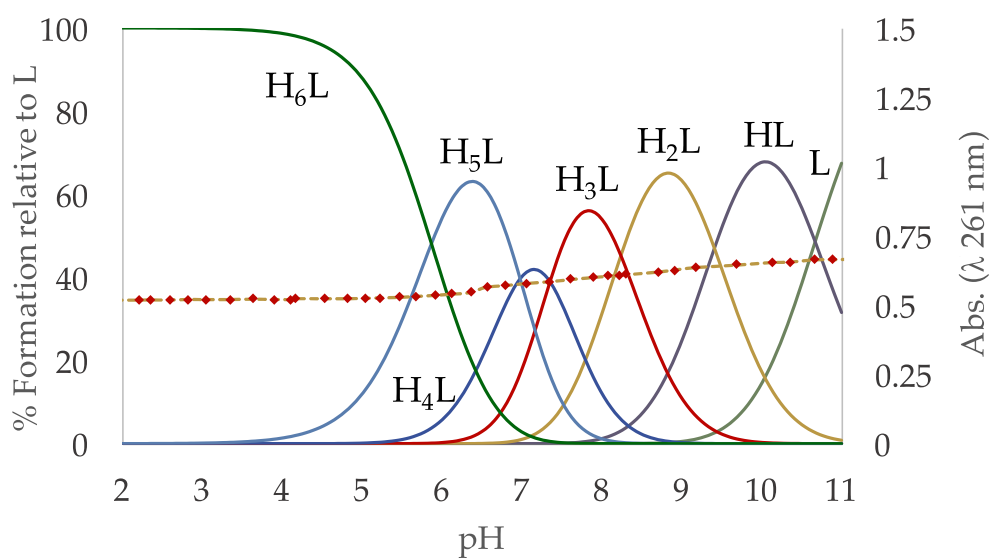

**Figure S20.** Distribution diagram of **L4** as a function of the pH in aqueous solution.

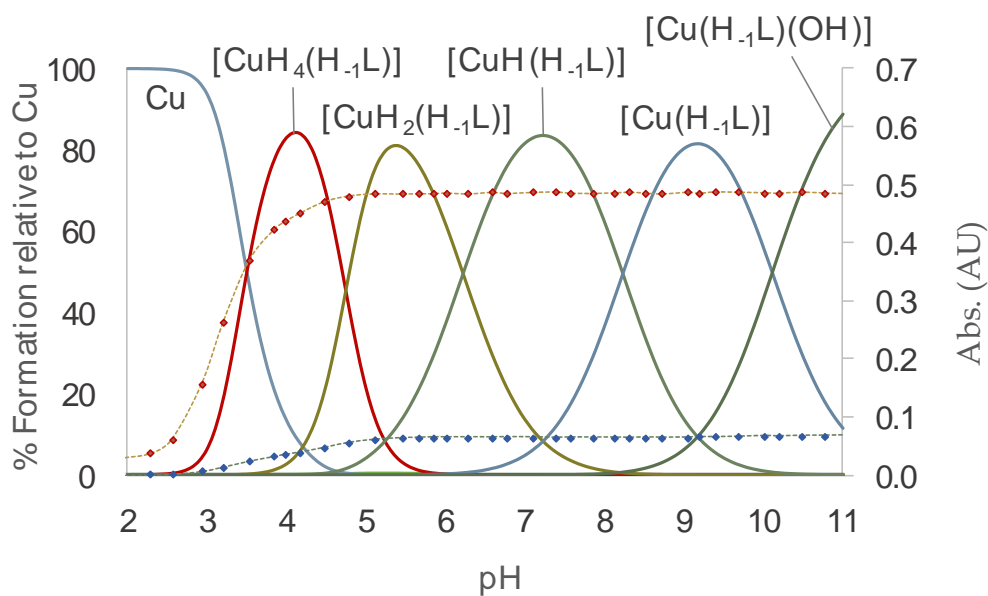

**Figure S21.** Distribution diagram of the Cu<sup>2+</sup>:**L1** 1:1 system as a function of the pH in aqueous solution. The UV-Vis spectroscopic parameters of the pyridine system (red dots) and d-d transition band (blue dots) are overlaid.

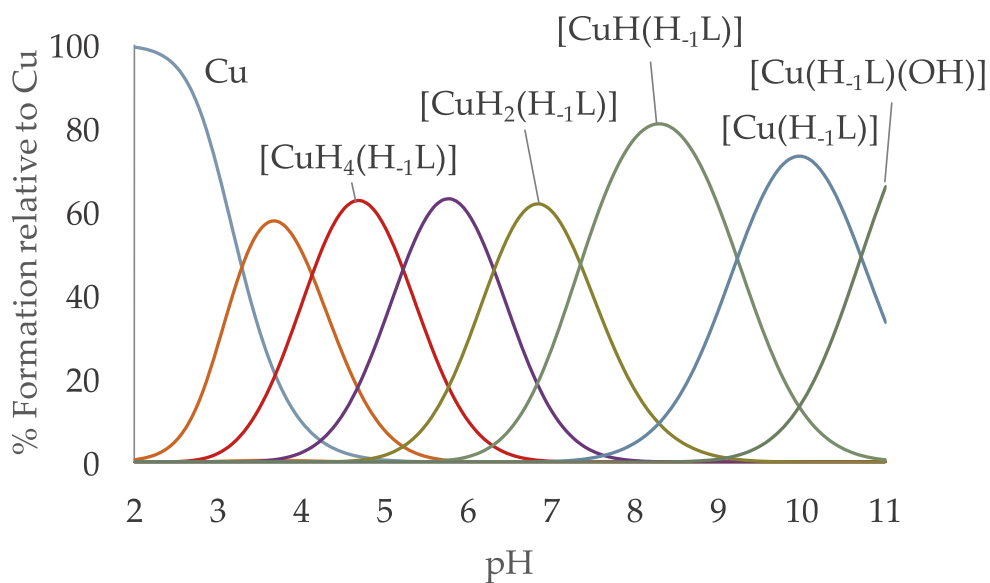

**Figure S22.** Distribution diagram of the Cu<sup>2+</sup>:L<sub>2</sub> 1:1 system as a function of the pH in aqueous solution.

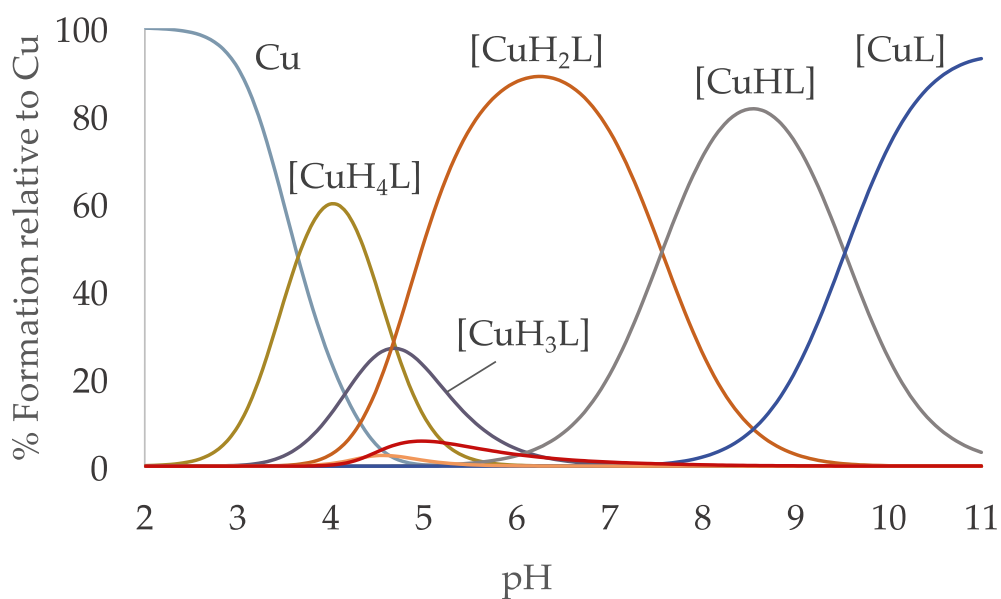

**Figure S23.** Distribution diagram of the Cu<sup>2+</sup>:L<sub>3</sub> 1:1 system as a function of the pH in aqueous solution.

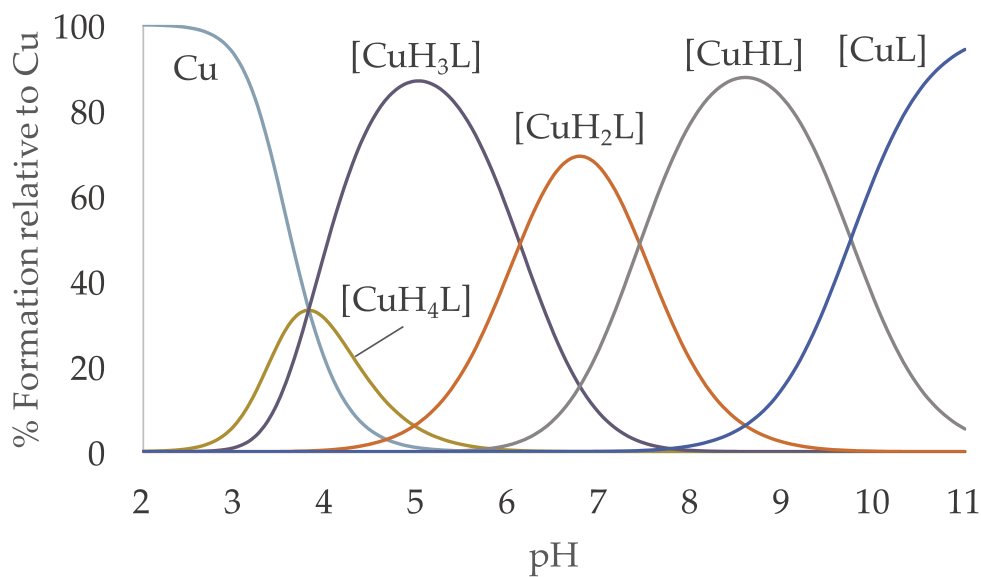

**Figure S24.** Distribution diagram of the  $\text{Cu}^{2+}:\text{L4}$  1:1 system as a function of the pH in aqueous solution.

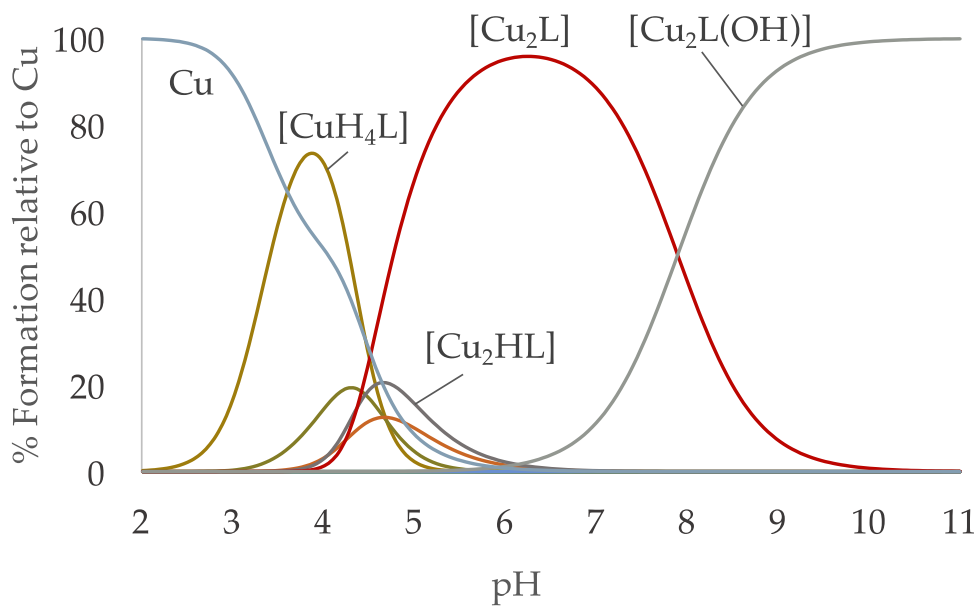

**Figure S25.** Distribution diagram of the  $\text{Cu}^{2+}:\text{L3}$  2:1 system as a function of the pH in aqueous solution.



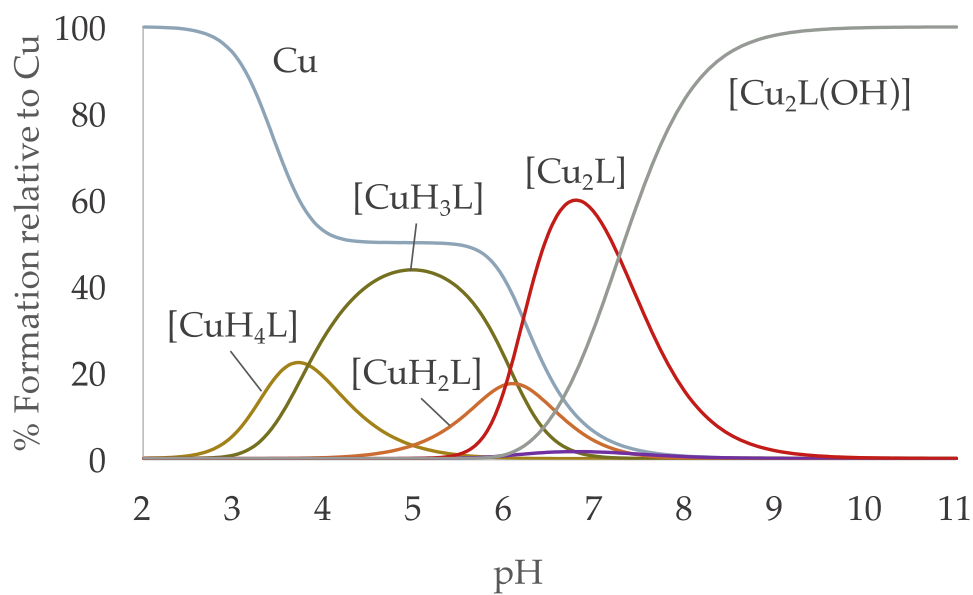

**Figure S26.** Distribution diagram of the  $\text{Cu}^{2+}:\text{L4}$  2:1 system as a function of the pH in aqueous solution.

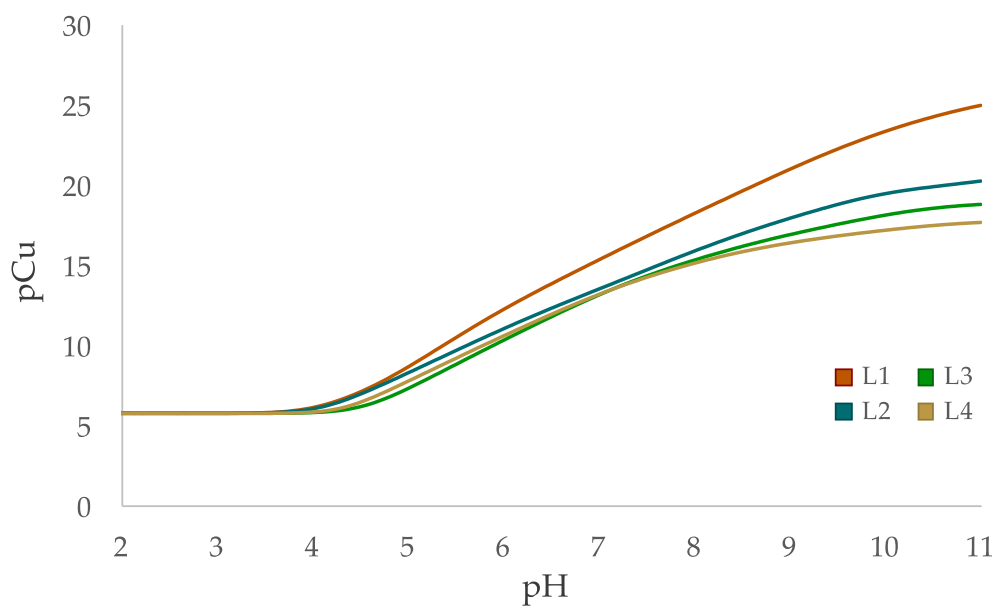

**Figure S27.** Representation of  $\text{pCu}^{2+}$  vs. pH for **L1** (brown line), **L2** (blue line), **L3** (green line) and **L4** (yellow line) ( $[\text{Cu}^{2+}]_{\text{tot}} = 2 \cdot 10^{-6} \text{ M}$ ;  $[\text{L}]_{\text{tot}} = 10^{-5} \text{ M}$ ).

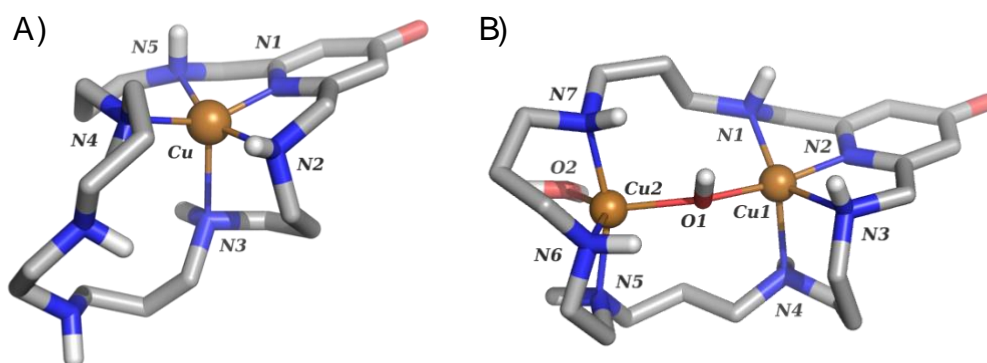

**Figure S28.** DFT optimized structure of  $\text{Cu}^{2+}:\text{L1}$  complex at physiological pH (7.40): A)  $\text{Cu}^{2+}:\text{L1}$  1:1, B)  $\text{Cu}^{2+}:\text{L1}$  2:1.

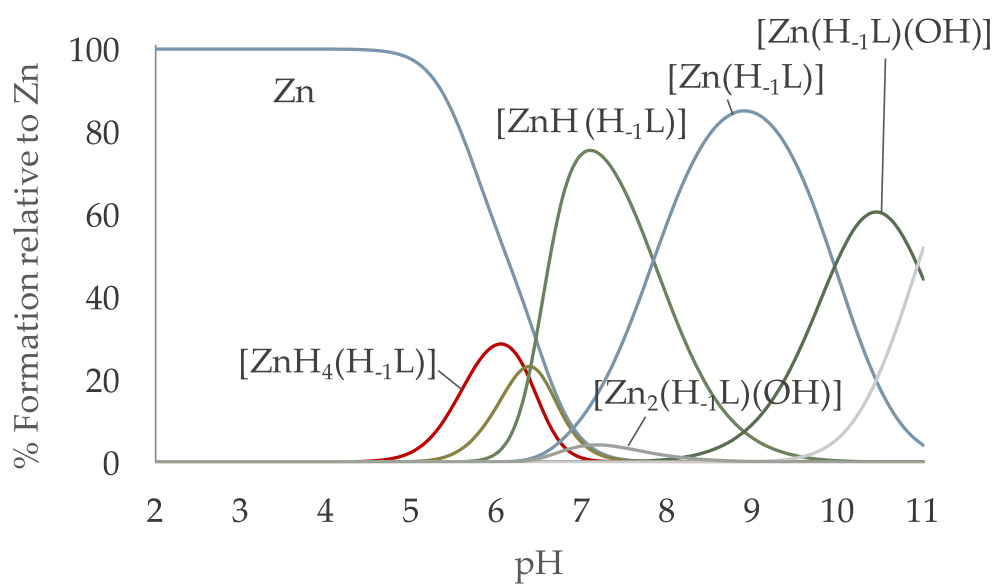

**Figure S29.** Distribution diagram of the  $\text{Cu}^{2+}:\text{L1}$  1:1 system as a function of the pH in aqueous solution.

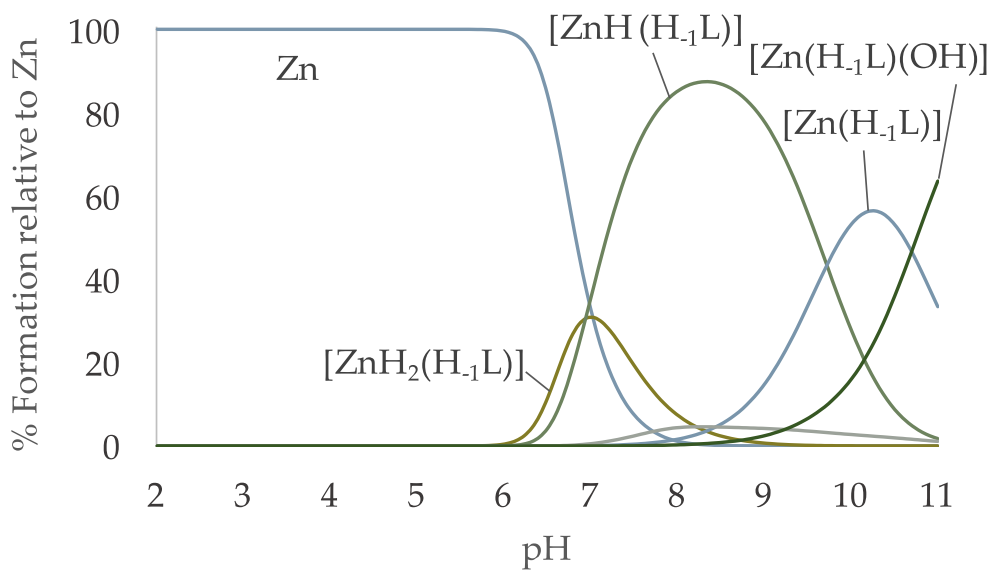

**Figure S30.** Distribution diagram of the  $\text{Cu}^{2+}:\text{L2}$  1:1 system as a function of the pH in aqueous solution.

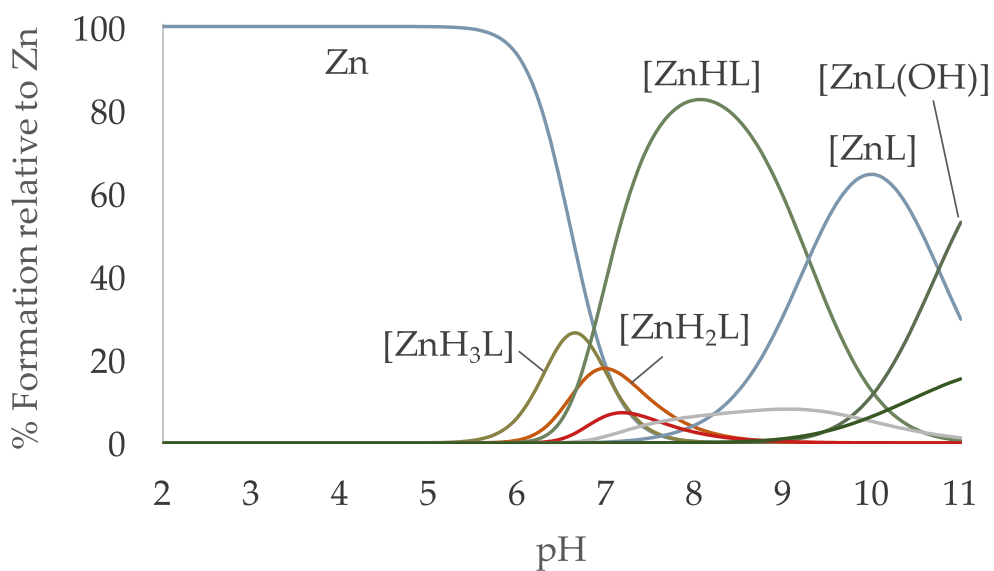

**Figure S31.** Distribution diagram of the  $\text{Cu}^{2+}:\text{L3}$  1:1 system as a function of the pH in aqueous solution.

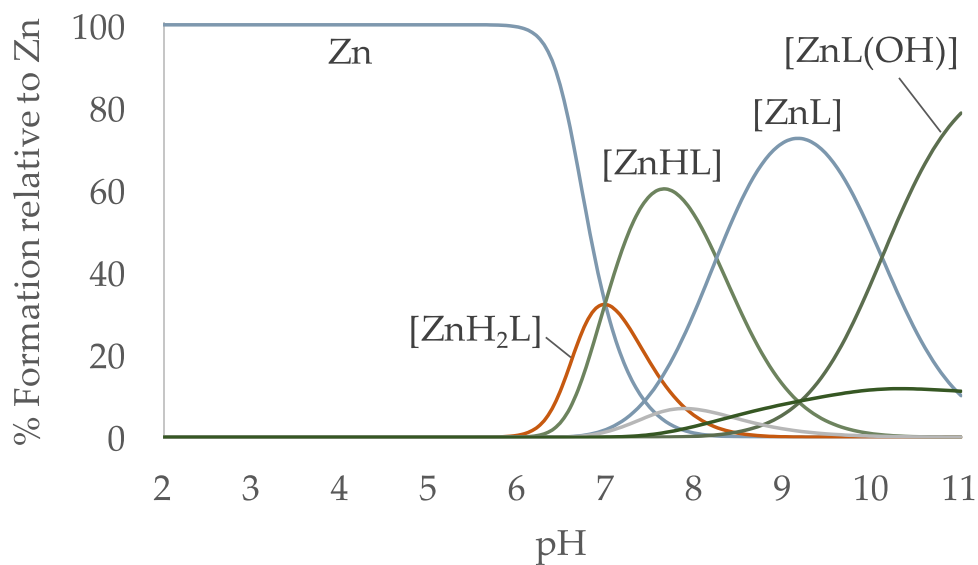

**Figure S32.** Distribution diagram of the  $\text{Cu}^{2+}:\text{L4}$  1:1 system as a function of the pH in aqueous solution.

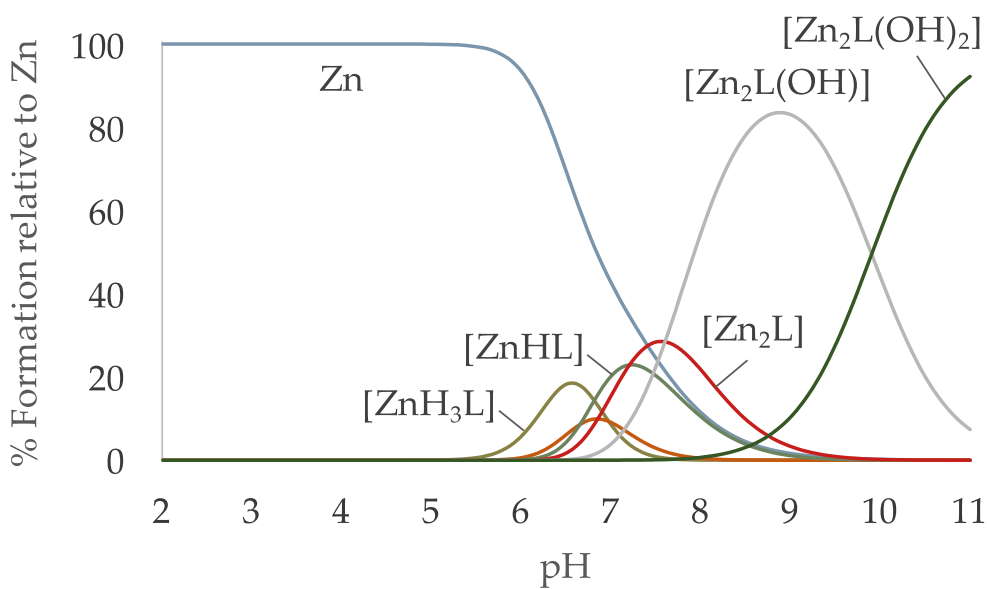

**Figure S33.** Distribution diagram of the  $\text{Cu}^{2+}:\text{L3}$  2:1 system as a function of the pH in aqueous solution.

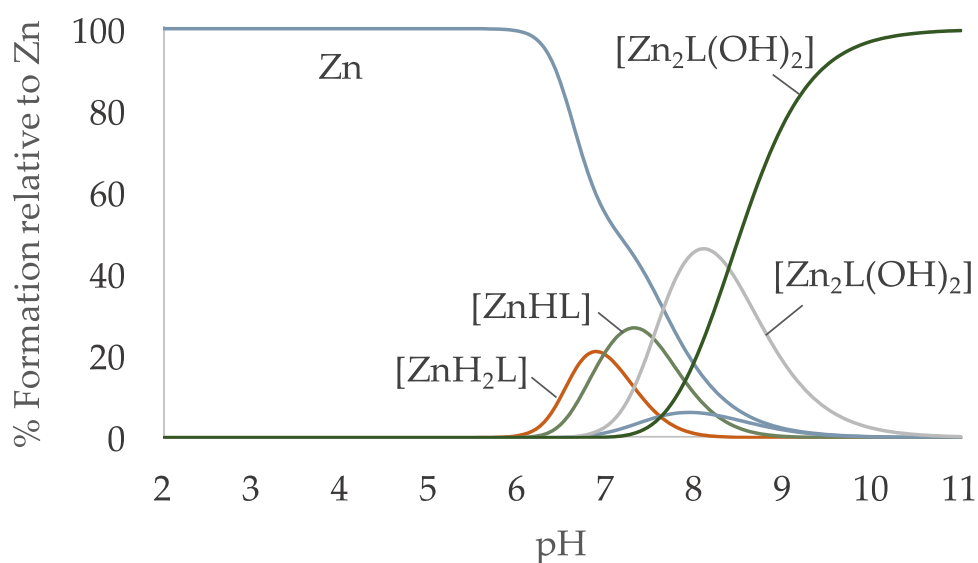

**Figure S34.** Distribution diagram of the  $\text{Cu}_2^+:\text{L4}$  2:1 system as a function of the pH in aqueous solution.

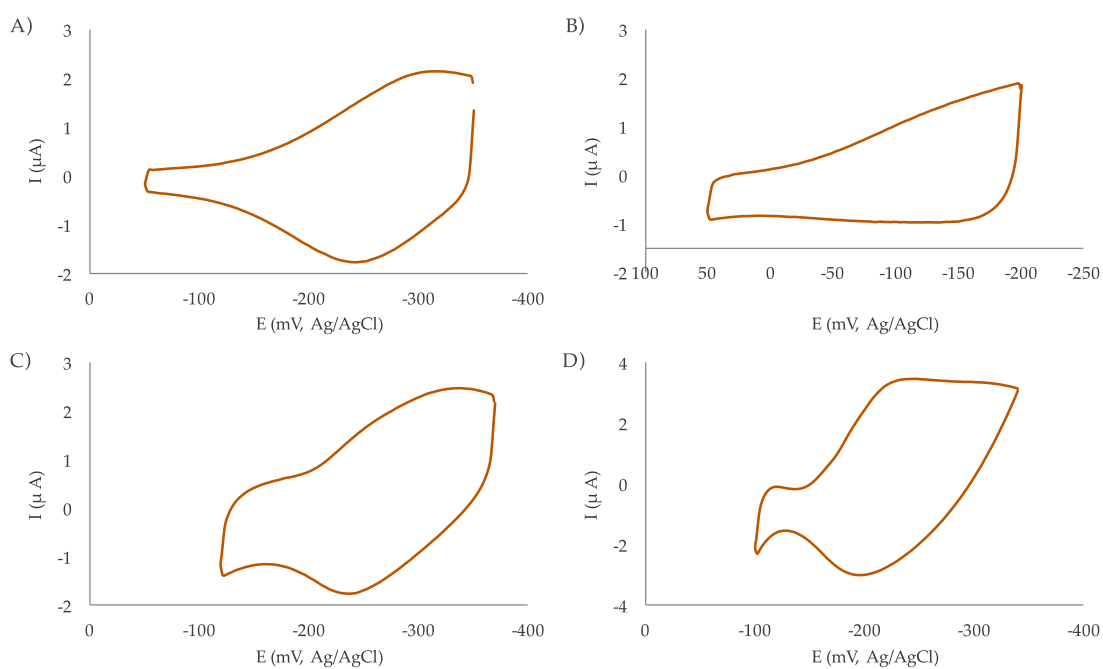

**Figure S35.** Cyclic voltammograms at glassy carbon electrode of  $10^{-3}$  M solutions of A) CuL1, B) Cu<sub>2</sub>L1, C) CuL2, D) Cu<sub>2</sub>L2 in 0.15 NaClO<sub>4</sub> aqueous solutions at pH 7.4. Potential scan rate 50 mV s<sup>-1</sup>. Semi-derivative deconvolution of data was performed to increase peak resolution.

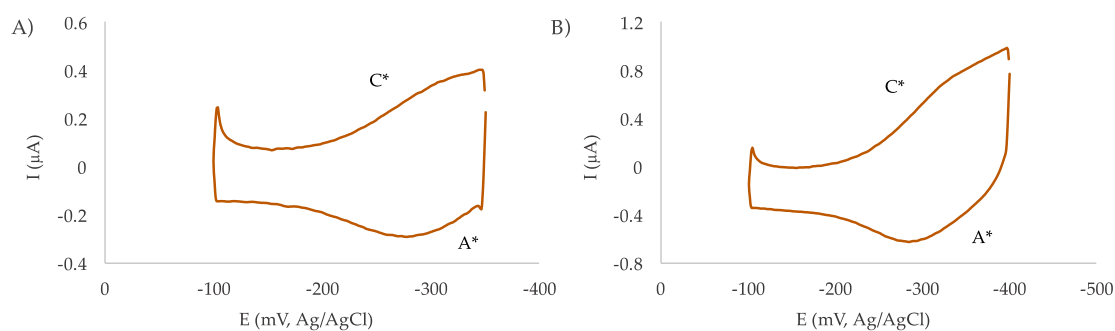

**Figure S36.** Cyclic voltammograms at glassy carbon electrode of  $10^{-3}$  M solutions of  $\text{Cu}^{2+}$  (aq) plus **BNP-L2** in A) 1:1 and B) 2:1 molar ratios, in 0.15  $\text{NaClO}_4$  aqueous solutions at pH 7.4. Semi-derivative deconvolution of data was performed to increase peak resolution.

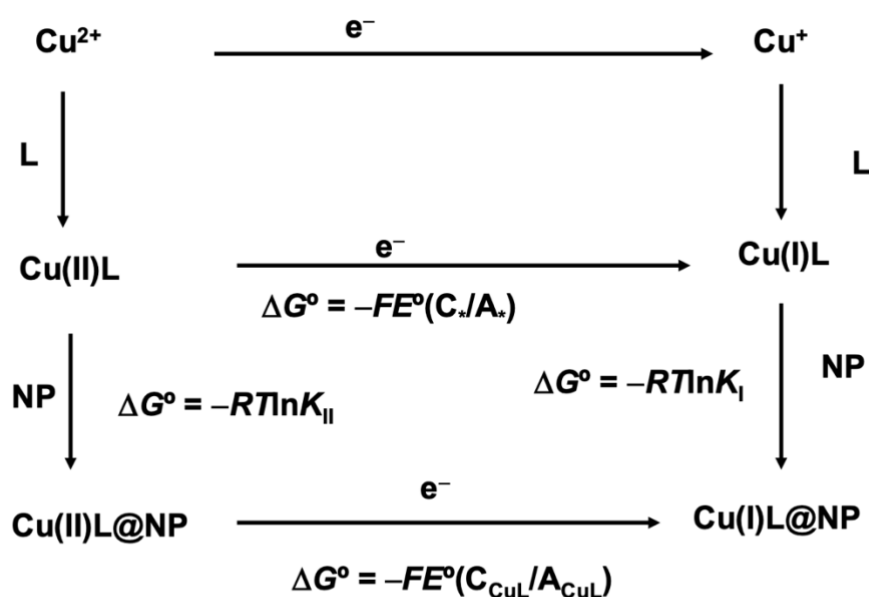

**Figure S37.** Thermochemical cycle for the NP-complex interaction and electrochemistry.

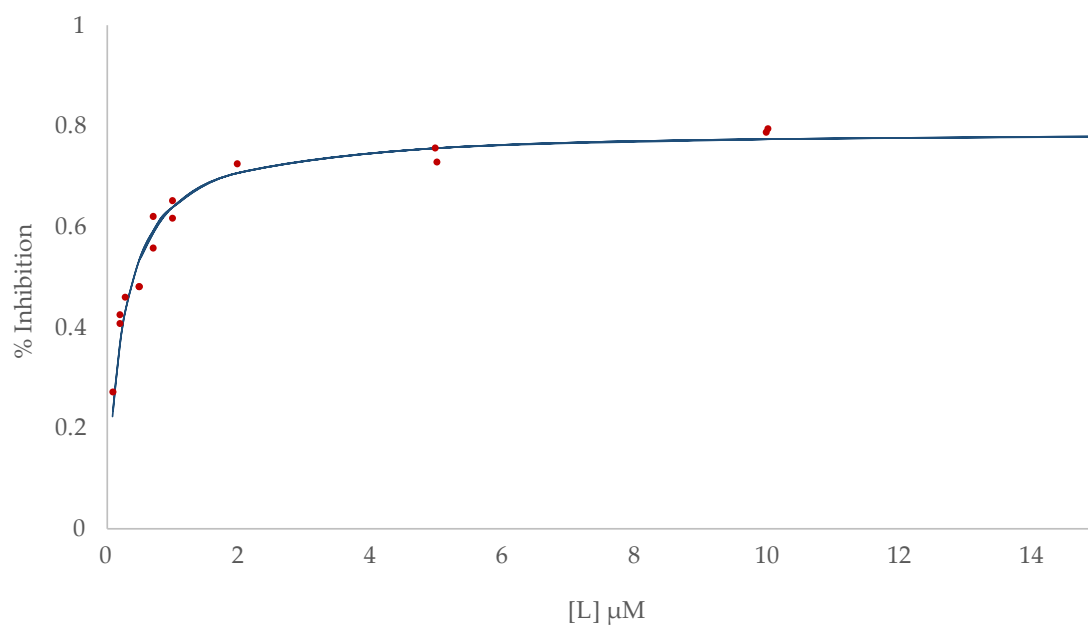

**Figure S38.** Fitting of the SOD activity data obtained by the McCord-Fridovich method for the system  $\text{Cu}_2\text{-L2}$ .

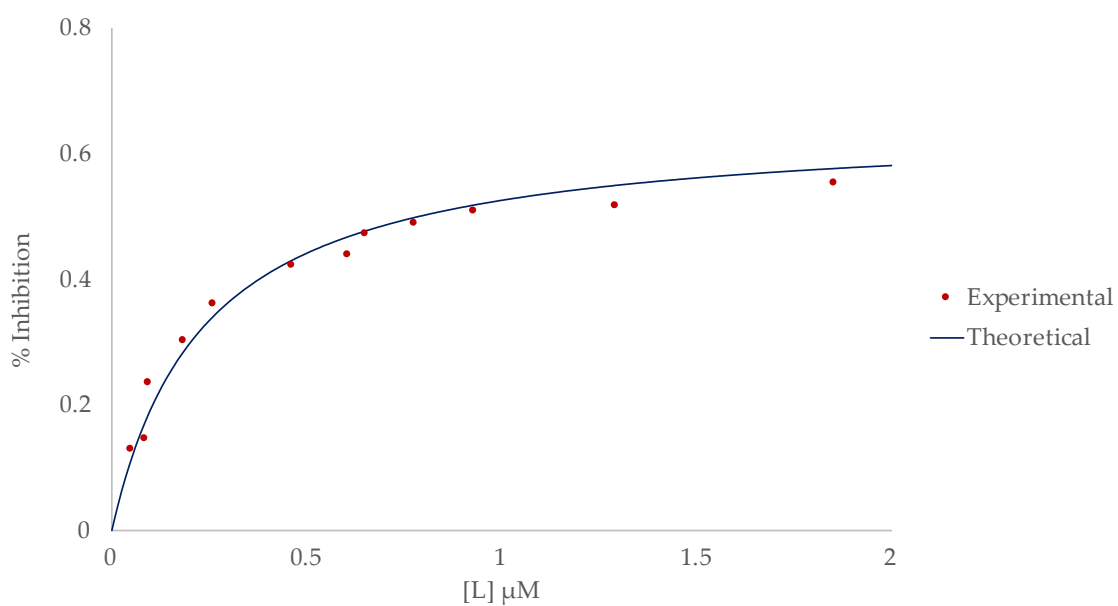

**Figure S39.** Fitting of the SOD activity data obtained by the McCord-Fridovich method for the system  $\text{Cu}_2\text{-BNP-L2}$ .

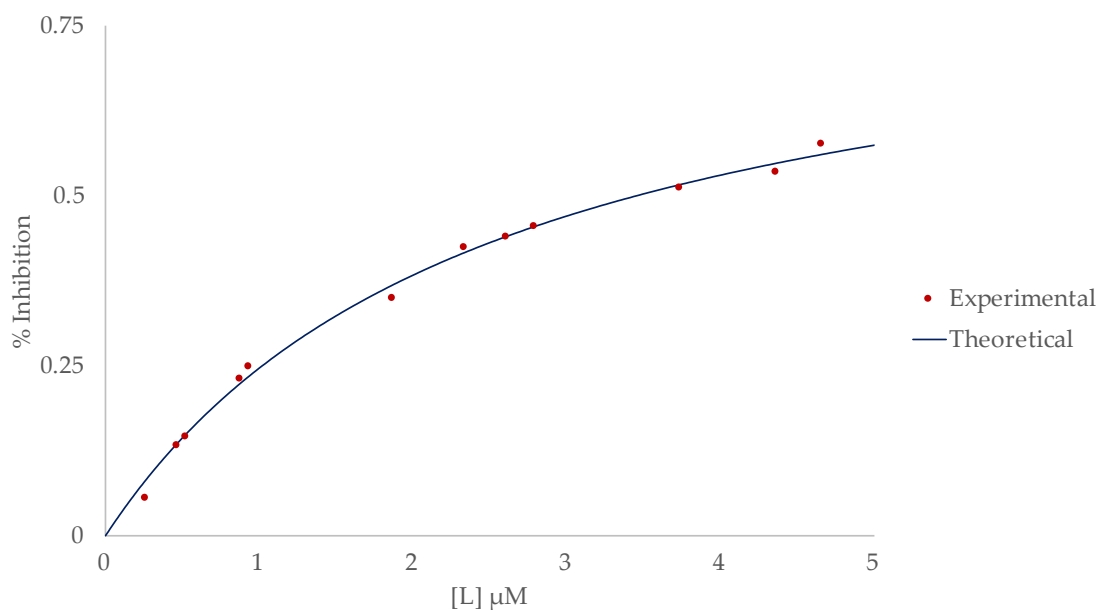

**Figure S40.** Fitting of the SOD activity data obtained by the McCord-Fridovich method for the system  $\text{Cu}_2\text{-SNP-L1}$ .

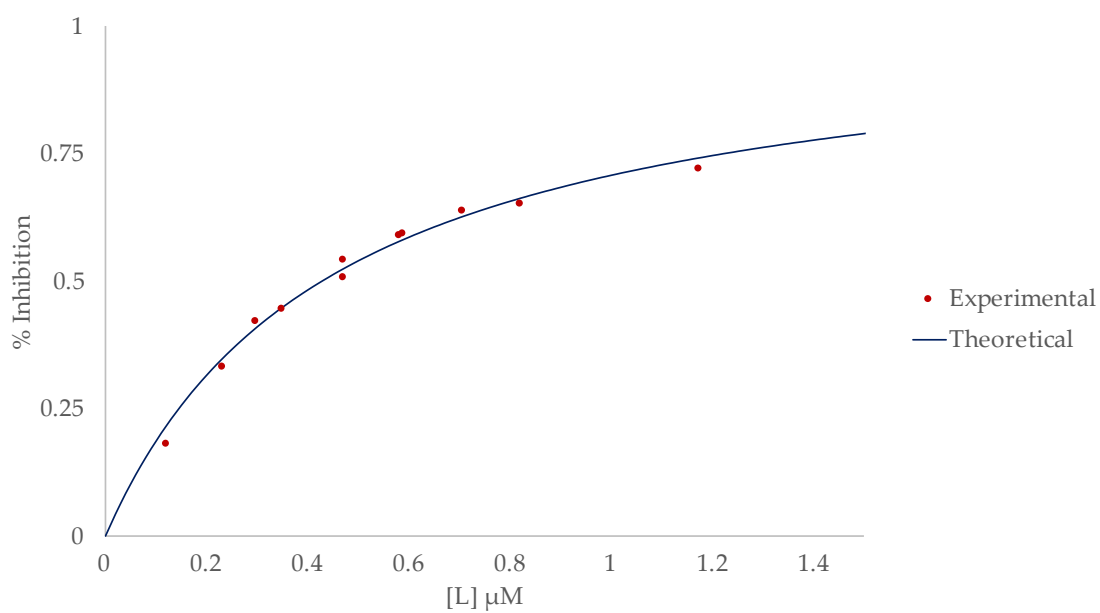

**Figure S41.** Fitting of the SOD activity data obtained by the McCord-Fridovich method for the system  $\text{Cu}_2\text{-SNP-L2}$ .



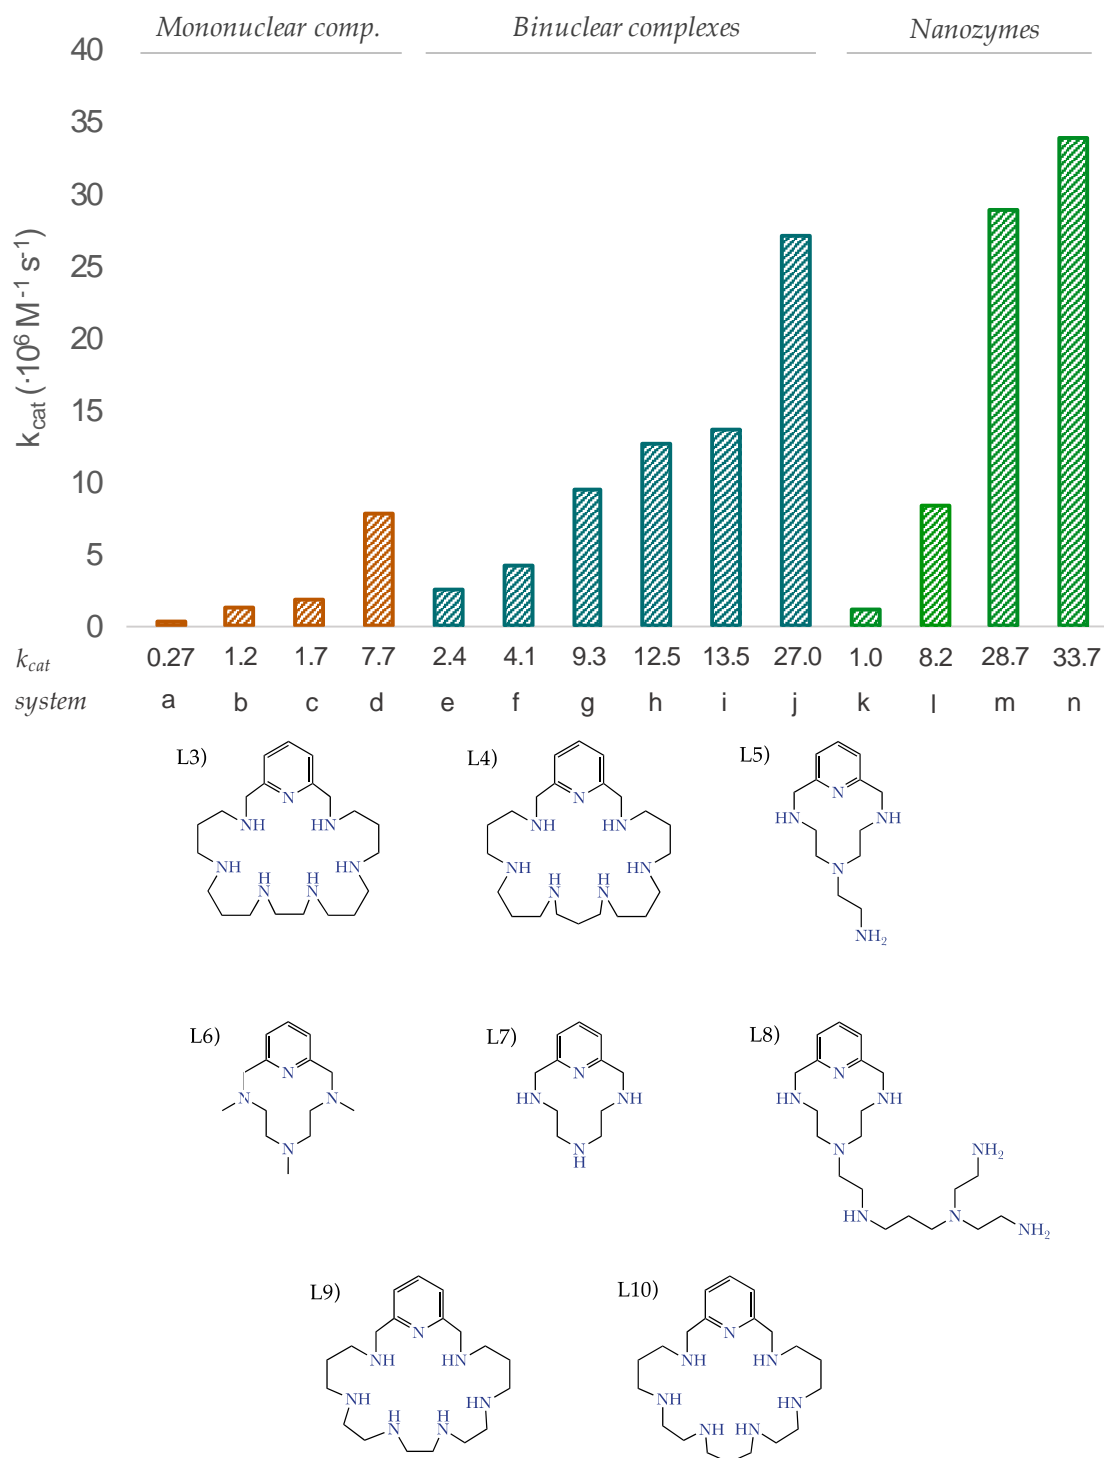

**Figure S42.** Representation of the catalytic constant corresponding to the systems: a) Cu-L5, Cu-L6, Cu-L7, Cu-L8, Cu<sub>2</sub>-L3, Cu<sub>2</sub>-L1, Cu<sub>2</sub>-L2, Cu<sub>2</sub>-L9, Cu<sub>2</sub>-L10, Cu<sub>2</sub>-L4, Cu<sub>2</sub>-SNP-L1, Cu<sub>2</sub>-SNP-L2, Cu<sub>2</sub>-BNP-L2, Cu<sub>2</sub>-BNP-L1.1-3

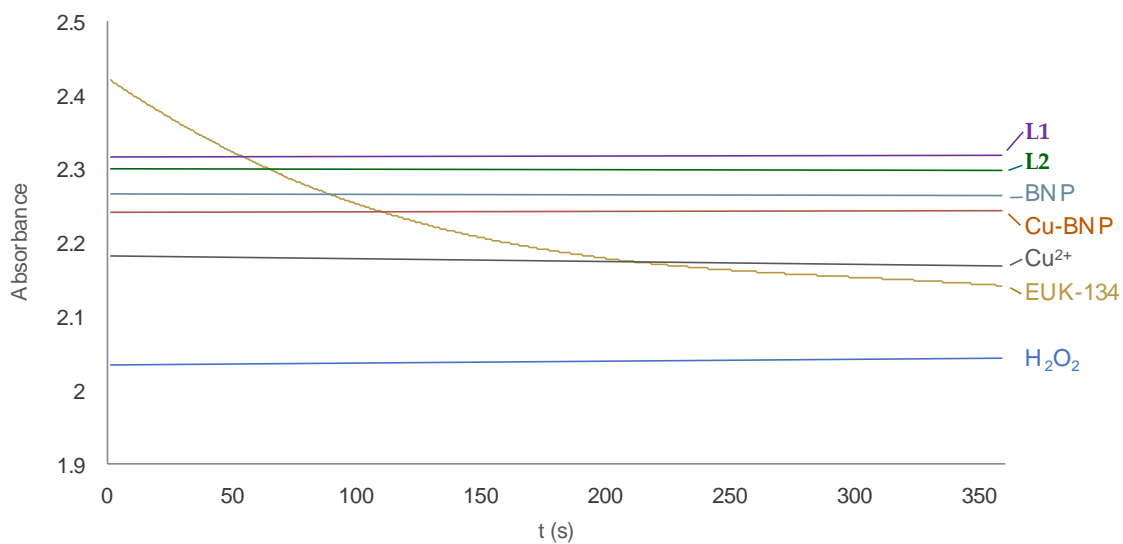

**Figure S43.** Representation of the variation of the absorbance intensity with time at 219 nm for H<sub>2</sub>O<sub>2</sub> solutions with the presence of the ligands, both functionalised and free in solution. Yellow line corresponds to the EUK-134 reference.<sup>4</sup>

## IV. Tables

**Table S1.** Concentration of the grafted ligand, Cu<sub>2+</sub> complexation capability and  $\zeta$ -potential values determined for the different nanoparticle systems. All measurements were carried out in 10<sup>-4</sup> M NaClO<sub>4</sub> at pH 7.4.

| System        | [L] (mol/g <sub>NP</sub> ) | [Cu <sub>2+</sub> ] (mol/g <sub>NP</sub> ) | $\zeta$ -potential (mV) |
|---------------|----------------------------|--------------------------------------------|-------------------------|
| BNP           | -                          | -                                          | 32.1(8)                 |
| <b>BNP-L1</b> | 3.5(4)·10 <sup>-5</sup>    | 6.8(6)·10 <sup>-5</sup>                    | 23.9(2)                 |
| <b>BNP-L2</b> | 2.20(2)·10 <sup>-4</sup>   | 4.2(8)·10 <sup>-4</sup>                    | 35(2)                   |
| SNP           | -                          | -                                          | -18.1(9)                |
| <b>SNP-L1</b> | 2.3(2)·10 <sup>-5</sup>    | 4.4(4)·10 <sup>-5</sup>                    | -14.9(2)                |
| <b>SNP-L2</b> | 3.3(3)·10 <sup>-5</sup>    | 6.0 (4)·10 <sup>-5</sup>                   | -5.6(2)                 |

a) Values in parenthesis are standard deviations in the last significant figure.

**Table S2.** Logarithms of the stepwise protonation constants for **L3** and **L4** obtained by potentiometric measurements.<sup>1</sup> The constants were determined in 0.15 M NaClO<sub>4</sub> at 298.1 ± 0.1 K.

| Reaction                                       | L3       | L4       |
|------------------------------------------------|----------|----------|
| $L + H^+ \rightleftharpoons HL^+$              | 10.67(1) | 10.67(1) |
| $HL^+ + H^+ \rightleftharpoons H_2L^{2+}$      | 9.85(1)  | 9.41(1)  |
| $H_2L^{2+} + H^+ \rightleftharpoons H_3L^{3+}$ | 8.60(1)  | 8.24(5)  |
| $H_3L^{3+} + H^+ \rightleftharpoons H_4L^{4+}$ | 7.49(1)  | 7.35(7)  |
| $H_4L^{4+} + H^+ \rightleftharpoons H_5L^{5+}$ | 7.12(1)  | 6.98(9)  |
| $H_5L^{5+} + H^+ \rightleftharpoons H_6L^{6+}$ | 4.99(2)  | 5.87(2)  |
| <b>log <math>\beta_b</math></b>                | 48.72    | 48.52    |

<sup>a</sup> Values in parentheses are standard deviations in the last significant figure.

<sup>b</sup> Log  $\beta = \sum \log K$

**Table S3.** Logarithm of the equilibrium constants for the interaction of  $\text{Cu}^{2+}$  with **L3** and **L4** obtained by potentiometric measurements.<sup>1</sup> The logarithms constants were determined in 0.15 M  $\text{NaClO}_4$  at  $298.1 \pm 0.1$  K.

| Entry | Reaction                                                                                                                | L3       | L4       |
|-------|-------------------------------------------------------------------------------------------------------------------------|----------|----------|
| 1     | $[\text{CuH}_3\text{L}]^{5+} + \text{H}^+ \rightleftharpoons [\text{CuH}_4\text{L}]^{6+}$                               | 4.69(2)  | 3.82(2)  |
| 2     | $[\text{CuH}_2\text{L}]^{4+} + \text{H}^+ \rightleftharpoons [\text{CuH}_3\text{L}]^{5+}$                               | 4.65(2)  | 6.13(2)  |
| 3     | $[\text{CuHL}]^{3+} + \text{H}^+ \rightleftharpoons [\text{CuH}_2\text{L}]^{4+}$                                        | 7.56(3)  | 7.44(2)  |
| 4     | $[\text{CuL}]^{2+} + \text{H}^+ \rightleftharpoons [\text{CuHL}]^{3+}$                                                  | 9.53(3)  | 9.75(3)  |
| 5     | $\text{L} + \text{Cu}^{2+} \rightleftharpoons [\text{CuL}]^{2+}$                                                        | 18.34(3) | 17.22(6) |
| 6     | $[\text{CuL}]^{2+} + \text{Cu}^{2+} \rightleftharpoons [\text{Cu}_2\text{L}]^{4+}$                                      | 11.69(3) | 7.96(6)  |
| 7     | $[\text{Cu}_2\text{L}]^{4+} + \text{H}_2\text{O} \rightleftharpoons [\text{Cu}_2\text{L}(\text{OH})]^{3+} + \text{H}^+$ | -7.72(3) | -7.26(6) |

<sup>a</sup> Values in parentheses are standard deviations in the last significant figure.

**Table S4.** Logarithms of the equilibrium constants for the interaction of  $\text{Zn}^{2+}$  with **L12** and **L2** obtained by potentiometric measurements. The logarithms constants were determined in 0.15 M  $\text{NaClO}_4$  at  $298.1 \pm 0.1$  K.

| Entry | Reaction                                                                                                                                                          | L13       | L2       |
|-------|-------------------------------------------------------------------------------------------------------------------------------------------------------------------|-----------|----------|
| 1     | $[\text{ZnH}_2(\text{H}_{-1}\text{L})]^{3+} + \text{H}^+ \rightleftharpoons [\text{ZnH}_3(\text{H}_{-1}\text{L})]^{4+}$                                           | 6.32(3)   | -        |
| 2     | $[\text{ZnH}(\text{H}_{-1}\text{L})]^{2+} + 2\text{H}^+ \rightleftharpoons [\text{ZnH}_3(\text{H}_{-1}\text{L})]^{4+}$                                            | 12.78(2)  | -        |
| 3     | $[\text{ZnH}(\text{H}_{-1}\text{L})]^{2+} + \text{H}^+ \rightleftharpoons [\text{ZnH}_2(\text{H}_{-1}\text{L})]^{3+}$                                             | -         | 6.96(3)  |
| 4     | $[\text{Zn}(\text{H}_{-1}\text{L})]^+ + \text{H}^+ \rightleftharpoons [\text{ZnH}(\text{H}_{-1}\text{L})]^{2+}$                                                   | 7.83(1)   | 9.76(2)  |
| 5     | $\text{Zn}^{2+} + \text{H}_{-1}\text{L}^- \rightleftharpoons [\text{Zn}(\text{H}_{-1}\text{L})]^+$                                                                | 14.65(2)  | 9.84(6)  |
| 6     | $[\text{Zn}(\text{H}_{-1}\text{L})]^+ + \text{H}_2\text{O} \rightleftharpoons [\text{Zn}(\text{H}_{-1}\text{L})(\text{OH})] + \text{H}^+$                         | -9.96(3)  | -        |
| 7     | $[\text{Zn}(\text{H}_{-1}\text{L})(\text{OH})] + \text{H}_2\text{O} \rightleftharpoons [\text{Zn}(\text{H}_{-1}\text{L})(\text{OH})_2]^- + \text{H}^+$            | -10.93(3) | -        |
| 8     | $2\text{Zn}^{2+} + [(\text{H}_{-1}\text{L})]^+ + \text{H}_2\text{O} \rightleftharpoons [\text{Zn}_2(\text{H}_{-1}\text{L})(\text{OH})]^{2+} + \text{H}^+$         | 11.14(2)  | 6.71(6)  |
| 9     | $2\text{Zn}^{2+} + [(\text{H}_{-1}\text{L})]^+ + 2\text{H}_2\text{O} \rightleftharpoons [\text{Zn}_2(\text{H}_{-1}\text{L})(\text{OH})_2]^{2+} + \text{H}^+$      | 2.33(3)   | -3.03(6) |
| 10    | $2\text{Zn}^{2+} + [(\text{H}_{-1}\text{L})]^+ + 3\text{H}_2\text{O} \rightleftharpoons [\text{Zn}_2(\text{H}_{-1}\text{L})(\text{OH})_3]^+ + \text{H}^+$         | -7.92(4)  |          |
| 11    | $\text{Zn}^{2+} + [\text{Zn}(\text{H}_{-1}\text{L})]^+ + \text{H}_2\text{O} \rightleftharpoons [\text{Zn}_2(\text{H}_{-1}\text{L})(\text{OH})]^{2+} + \text{H}^+$ | -3.51(3)  | -3.13(3) |
| 12    | $[\text{Zn}_2(\text{H}_{-1}\text{L})(\text{OH})]^{2+} + \text{H}_2\text{O} \rightleftharpoons [\text{Zn}_2(\text{H}_{-1}\text{L})(\text{OH})_2]^+ + \text{H}^+$   | -8.81(3)  | -9.74(6) |
| 13    | $[\text{Zn}_2(\text{H}_{-1}\text{L})(\text{OH})_2]^{2+} + \text{H}_2\text{O} \rightleftharpoons [\text{Zn}_2(\text{H}_{-1}\text{L})(\text{OH})_3] + \text{H}^+$   | -10.25(4) | -        |

<sup>a</sup> Values in parentheses are standard deviations in the last significant figure.

**Table S5.** Logarithm of the equilibrium constants for the interaction of  $Zn^{2+}$  with **L3** and **L4** obtained by potentiometric measurements.<sup>1</sup> The logarithms constants were determined in 0.15 M  $NaClO_4$  at  $298.1 \pm 0.1$  K.

| Entry | Reaction                                                              | L3        | L4        |
|-------|-----------------------------------------------------------------------|-----------|-----------|
| 1     | $[ZnH_2L]^{4+} + H^+ \rightleftharpoons [ZnH_3L]^{5+}$                | 6.97(4)   | -         |
| 2     | $[ZnHL]^{3+} + H^+ \rightleftharpoons [ZnH_2L]^{4+}$                  | 6.65(6)   | 6.99(3)   |
| 3     | $[ZnL]^{2+} + H^+ \rightleftharpoons [ZnHL]^{3+}$                     | 9.28(3)   | 8.24(4)   |
| 4     | $Zn^{2+} + L \rightleftharpoons [ZnL]^{2+}$                           | 10.76(4)  | 10.32(4)  |
| 5     | $Zn^{2+} + L + H_2O \rightleftharpoons [ZnL(OH)]^+ + H^+$             | 0.01(5)   | 0.21(6)   |
| 6     | $[ZnL]^{2+} + H_2O \rightleftharpoons [ZnL(OH)]^+ + H^+$              | -10.75(7) | -10.11(7) |
| 7     | $2Zn^{2+} + L \rightleftharpoons [Zn_2L]^{4+}$                        | 15.69(5)  | -         |
| 8     | $Zn^{2+} + [ZnL]^{2+} \rightleftharpoons [Zn_2L]^{4+}$                | 4.93(6)   | -         |
| 9     | $2Zn^{2+} + L + H_2O \rightleftharpoons [Zn_2L(OH)]^{3+} + H^+$       | 8.10(2)   | 6.36(6)   |
| 10    | $2Zn^{2+} + L + 2H_2O \rightleftharpoons [Zn_2L(OH)_2]^{2+} + H^+$    | -1.80(2)  | -2.03(1)  |
| 11    | $[Zn_2L]^{4+} + H_2O \rightleftharpoons [Zn_2L(OH)]^{3+} + H^+$       | -7.59(5)  | -         |
| 12    | $[Zn_2L(OH)]^{3+} + H_2O \rightleftharpoons [Zn_2L(OH)_2]^{2+} + H^+$ | -9.90(3)  | -8.39(6)  |

<sup>a</sup> Values in parentheses are standard deviations in the last significant figure.

**Table S6.** Logarithm of the equilibrium constants for the interaction of  $Cu^{2+}$  and  $Zn^{2+}$  with **L3** and **L4** obtained by potentiometric measurements.<sup>1</sup> The logarithms constants were determined in 0.15 M  $NaClO_4$  at  $298.1 \pm 0.1$  K.

| Entry | Reaction                                                                     | L3       | L4       |
|-------|------------------------------------------------------------------------------|----------|----------|
| 4     | $[CuZnL]^{4+} + H^+ \rightleftharpoons [CuZnHL]^{5+}$                        | -        | 30.23(6) |
| 5     | $Cu^{2+} + Zn^{2+} + L \rightleftharpoons [CuZnL]^{4+}$                      | 23.26(9) | -        |
| 6     | $Cu^{2+} + Zn^{2+} + L + H_2O \rightleftharpoons [CuZnL(OH)]^{3+} + H^+$     | 18.57(2) | 14.55(3) |
| 7     | $Cu^{2+} + Zn^{2+} + L + 2H_2O \rightleftharpoons [CuZnL(OH)_2]^{2+} + 2H^+$ | 5.34(6)  | 6.24(3)  |

<sup>a</sup> Values in parentheses are standard deviations in the last significant figure.

## IV. References

- 1 R. Belda, S. Blasco, B. Verdejo, H. R. Jiménez, A. Doménech-Carbó, C. Soriano, J. Latorre, C. Terencio and E. García-España, *Dalton Trans.*, 2013, **42**, 11194.
- 2 Á. Martínez-Camarena, E. Delgado-Pinar, C. Soriano, J. Alarcón, J. M. Llinares, R. Tejero and E. García-España, *Chem. Commun.*, 2018, **54**, 3871.
- 3 L. Guijarro, M. Inclán, J. Pitarch-Jarque, A. Doménech-Carbó, J. U. Chicote, S. Trefler, E. García-España, A. García-España and B. Verdejo, *Inorg. Chem.*, 2017, **56**, 13748.
- 4 I. Ivanović-Burmazović and M. R. Filipović, *Adv. Inorg. Chem.*, 2012, **64**, 53.
